# Supplementary material
Source: PubMed Central journal article supplement (PMC5876909)
Supplement: jama-e182757-s001.pdf [file jama-e182757-s001.pdf]

## Supplementary Online Content

Sobieraj DM, Baker WL, Nguyen E, et al. Association of inhaled corticosteroids and long-acting muscarinic antagonists with asthma control in patients with uncontrolled, persistent asthma: a systematic review and meta-analysis. *JAMA*.  
doi:10.1001/jama.2018.2757

**eAppendix A.** Search Strategies

**eAppendix B.** Strength of Evidence

**eTable 1.** Study and Population Baseline Characteristics for LAMA vs Placebo as Add-on to ICS RCTs

**eTable 2.** Study and Population Baseline Characteristics for LAMA vs Other Controller as Add-on to ICS RCTs

**eTable 3.** Study and Population Baseline Characteristics for LAMA Added to ICS and LABA vs ICS and LABA RCTs

**eTable 4.** Subgroup Analysis for Tiotropium Dose

**eTable 5.** Sensitivity Analyses Removing Studies With High Risk of Bias

**eFigure 1.** Assessment of Risk of Bias Using Cochrane Collaboration Tool

**eFigure 2.** Summative Assessment of Risk of Bias

**eFigure 3.** Asthma Worsening

**eFigure 4.** ACQ-7 Responder

**eFigure 5.** FEV<sub>1</sub> Peak (L)

**eFigure 6.** FEV AUC (L)

**eFigure 7.** FEV% Predicted

**eFigure 8.** FVC Peak (L)

**eFigure 9.** FVC Trough (L)

**eFigure 10.** FVC AUC (L)

**eFigure 11.** AQLQ Score

**eFigure 12.** Metaregression for Association of Exacerbation Risk With Duration of Study Follow-up (LAMA vs Placebo as Add-on to ICS)

**eFigure 13.** Metaregression for Association of Exacerbation Risk With Duration of Study Follow-up (LAMA vs LABA as Add-on to ICS)

**eFigure 14.** Metaregression for Association of Change in FEV<sub>1</sub> (L) With Duration of Study Follow-up (LAMA vs Placebo as Add-on to ICS)

**eFigure 15.** Metaregression for Association of Change in FEV<sub>1</sub> (L) With Duration of Study Follow-up (LAMA vs LABA as Add-on to ICS)

**eFigure 16.** Metaregression for Association of Rescue Medication Use (Puffs/24 h) With Duration of Study Follow-up (LAMA vs Placebo as Add-on to ICS)

**eFigure 17.** Metaregression for Association of Rescue Medication Use (Puffs/24 h) With Duration of Study Follow-up (LAMA vs LABA as Add-on to ICS)

This supplementary material has been provided by the authors to give readers additional information about their work.

## **eAppendix A. Search strategies**

### **Medline, Cochrane Central and Cochrane Database of Systematic Reviews- via Ovid**

1. Asthma.mp or Asthma/
2. Wheez\$.mp.
3. Bronchial spasm/ or bronchospas\$.mp.
4. Bronchoconstriction/ or bronchoconstrict\$.mp.
5. Bronchial hyperreactivity/
6. Reactive airway disease.mp.
7. 1 or 2 or 3 or 4 or 5 or 6
8. Long acting muscarinic antagonist.mp.
9. Tiotropium bromide/ or tiotropium.mp.
10. Acclidinium.mp.
11. Glycopyrronium.mp. or glycopyrrolate/ or glycopyrrolate.mp.
12. Umeclidinium.mp.
13. 9 or 10 or 11 or 12
14. 8 or 13
15. 7 and 14
16. Limit 15 to humans

### **Embase**

1. 'asthma'/de OR asthma
2. 'wheezing'/de OR wheezing
3. 'wheeze'/de OR wheeze
4. 'bronchospasm'/de OR 'bronchospasm'
5. 'bronchoconstriction'/de OR 'bronchoconstriction'
6. 'bronchial hyperreactivity'/de OR
7. 'reactive airway disease'
8. #1 OR #2 OR #3 OR #4 OR #5 OR #6 OR #7
9. 'long acting muscarinic antagonist'
10. 'tiotropium'/exp/dd\_ih
11. 'aclidinium'/exp/dd\_ih
12. 'glycopyrronium'/exp/dd\_ih
13. 'glycopyrrolate'/exp/dd\_ih
14. 'umeclidinium'/exp/dd\_ih
15. #9 OR #10 OR #11 OR #12 OR #13 OR #14
16. #8 AND #15

## eAppendix B. Strength of Evidence

Strength of evidence was based on the five following domains:

- Risk of bias: The overall pattern within the 7 risk of bias domains was considered along with how much the individual study contributed to the overall analysis sample size.
- Consistency: Consistency refers to the degree of similarity in the direction of effects (do all studies show the same effect, e.g. all superior or all null) and the magnitude of effect (the degree to which point estimates are similar) across studies within an evidence base. The magnitude of effect is often evaluated quantitatively using test for the presence (e.g., Cochran's Q test) or the magnitude of heterogeneity (e.g.,  $I^2$  statistic).
- Directness: Directness of evidence expresses how closely available evidence measures an outcome of interest, both in the directness of the outcome and the comparison. This represents a single link between an intervention and the outcome. Comparisons are considered direct when the studies compare interventions specifically with each other.
- Precision: Precision is the degree of certainty surrounding an estimate of effect with respect to an outcome. A precise body of evidence should enable decisionmakers to draw conclusions about whether one treatment is superior, inferior, or equivalent to another. For continuous outcomes, we used the minimally important difference (where available) for each outcome and whether confidence intervals crossed that threshold. For dichotomous outcomes, we used a relative risk increase or reduction of 0.25 from the point estimate. If the confidence interval crossed these thresholds, the outcome was comparison/outcome was considered imprecise.
- Publication bias: Publication bias occurs when a decision is made to publish or report research findings based on their direction or magnitude of effect. Visual evaluations of funnel plots and tests for plot asymmetry were considered. Significant evaluations and tests were deemed to have positive publication bias.

Using evaluations of the 5 domains above, strength of evidence for each comparison and outcome was defined as:

- High: We are very confident that the estimate of effect lies close to the true effect for this outcome. The body of evidence has few or no deficiencies. We believe that the findings are stable, i.e., another study would not change the conclusions.
- Moderate: We are moderately confident that the estimate of effect lies close to the true effect for this outcome. The body of evidence has some deficiencies. We believe the findings are likely to be stable, but some doubt remains.
- Low: We have limited confidence that the estimate of effect lies close to the true effect for this outcome. The body of evidence has major or numerous deficiencies (or both). We believe that additional evidence is needed before concluding either that the findings are stable or that the estimate of effect is close to the true effect.
- Insufficient: We have no evidence, we are unable to estimate an effect, or we have no confidence in the estimate of the effect for this outcome. No evidence is available of the body of evidence has unacceptable deficiencies, precluding reaching a conclusion.

The strength of evidence was downgraded when one or more of the five domains above were noted.

**eTable 1. Study and population baseline characteristics for LAMA vs. placebo as add-on to ICS RCTs**

| Study, Year                          | Duration of follow-up | Study population                                                                                                                                                                                                                                                                                                                               | Intervention Comparisons                               | Age (y) [mean (SD)] | Males [No., (%)] | Duration of asthma (y) [mean (SD)] | FEV1 (L) [mean (SD)] | FEV1 % predicted [mean (SD)] | Rescue inhaler use (puffs/d) [mean (SD)] | ICS dose during study ( $\mu\text{g}/\text{d}$ ) [mean (SD)] |
|--------------------------------------|-----------------------|------------------------------------------------------------------------------------------------------------------------------------------------------------------------------------------------------------------------------------------------------------------------------------------------------------------------------------------------|--------------------------------------------------------|---------------------|------------------|------------------------------------|----------------------|------------------------------|------------------------------------------|--------------------------------------------------------------|
| Peters, 2010 <sup>13</sup>           | 14w                   | ≥18 years of age with moderately severe asthma not well controlled on a ICS alone. Tiotropium or salmeterol were added on to run-in dose of beclomethasone 80 $\mu\text{g}$ BID                                                                                                                                                                | Tiotropium 18 $\mu\text{g}$ daily (Handihaler) n=210   | 42.2 (12.3)         | 69 (32.9)        | 26.1 (14.1)                        | 2.31 (0.77)          | 71.5 (14.9)                  | 1.71 (2.09)                              | NR                                                           |
|                                      |                       |                                                                                                                                                                                                                                                                                                                                                | Doubling ICS dose to 160 $\mu\text{g}$ BID (MDI) n=210 |                     |                  |                                    |                      |                              |                                          |                                                              |
| Bateman, 2011 <sup>1</sup>           | 16w                   | 18-65 years of age with moderate persistent asthma (GINA step 3) not controlled on ICS alone (400-1000 $\mu\text{g}/\text{d}$ budesonide or equivalent). Randomized therapy added on to ICS continued at prestudy dose                                                                                                                         | Tiotropium 5 $\mu\text{g}$ daily (Respimat) n=128      | 43.5 (12.6)         | 46 (35.9)        | 18.1 (12.1)                        | 2.3 (0.77)           | 74.1 (16.1)                  | NR                                       | NR                                                           |
|                                      |                       |                                                                                                                                                                                                                                                                                                                                                | Placebo n=126                                          | 44.0 (11.9)         | 51 (40.5)        | 17.3 (12.2)                        | 2.4 (0.8)            | 75.3 (19.0)                  | NR                                       | NR                                                           |
| Kerstjens, 2015 <sup>2</sup> Study 1 | 24w                   | 18-75 year of age with moderate persistent asthma according to GINA guidelines despite treatment with stable medium dose ICS (400-800 $\mu\text{g}/\text{d}$ budesonide or equivalent) alone or in fixed combination with LABA, symptomatic with ACQ-7 ≥1.5. Randomized therapy was added to prestudy stable maintenance ICS dose <sup>a</sup> | Tiotropium 5 $\mu\text{g}$ daily (Respimat) n=264      | 44.4 (12.6)         | 110 (41.7)       | 22.9 (14.7)                        | 2.2 (0.6)            | 72.2 (8.2)                   | NR                                       | 666.4 (216.2) <sup>b</sup>                                   |
|                                      |                       |                                                                                                                                                                                                                                                                                                                                                | Tiotropium 2.5 $\mu\text{g}$ daily (Respimat) n=262    | 43.7 (13.1)         | 106 (40.5)       | 22.2 (14.1)                        | 2.2 (0.7)            | 73.1 (8.6)                   | NR                                       | 649.8 (196.2) <sup>b</sup>                                   |
|                                      |                       |                                                                                                                                                                                                                                                                                                                                                | Placebo n=269                                          | 42.5 (13.1)         | 103 (38.3)       | 20.2 (13.4)                        | 2.3 (0.7)            | 73.0 (8.2)                   | NR                                       | 661.5 (209.5) <sup>b</sup>                                   |

**eTable 1. Study and population baseline characteristics for LAMA vs. placebo as add-on to ICS RCTs (Continued)**

| Study, Year                             | Duration of follow-up | Study population                                                                                                                                                                                                                                                                                                            | Intervention Comparisons                                 | Age (y) [mean (SD)] | Males [No., (%)] | Duration of asthma (y) [mean (SD)]        | FEV1 (L) [mean (SD)] | FEV1 % predicted [mean (SD)] | Rescue inhaler use (puffs/d) [mean (SD)] | ICS dose during study (µg/d) [mean (SD)] |
|-----------------------------------------|-----------------------|-----------------------------------------------------------------------------------------------------------------------------------------------------------------------------------------------------------------------------------------------------------------------------------------------------------------------------|----------------------------------------------------------|---------------------|------------------|-------------------------------------------|----------------------|------------------------------|------------------------------------------|------------------------------------------|
| Kerstjens, 2015 <sup>2</sup><br>Study 2 | 24w                   | 18-75 year of age with moderate persistent asthma according to GINA guidelines despite treatment with stable medium dose ICS (400-800µg/d budesonide or equivalent) alone or in fixed combination with LABA, symptomatic with ACQ-7 ≥1.5. Randomized therapy was added to prestudy stable maintenance ICS dose <sup>c</sup> | Tiotropium 5µg daily (Respimat)<br>n=253                 | 44.3 (12.7)         | 107 (42.3)       | 23.1 (15.3)                               | 2.3 (0.6)            | 72.2 (8.3)                   | NR                                       | 661.3 (216.1) <sup>b</sup>               |
|                                         |                       |                                                                                                                                                                                                                                                                                                                             | Tiotropium 2.5µg daily (Respimat)<br>n=257               | 43.0 (12.6)         | 97 (37.7)        | 21.9 (14.5)                               | 2.3 (0.7)            | 72.5 (8.0)                   | NR                                       | 662.1 (229.5) <sup>b</sup>               |
|                                         |                       |                                                                                                                                                                                                                                                                                                                             | Placebo<br>n=254                                         | 43.0 (13.0)         | 109 (42.9)       | 22.0 (13.9)                               | 2.3 (0.7)            | 73.0 (8.4)                   | NR                                       | 675.6 (225.4) <sup>b</sup>               |
| Lee, 2015 <sup>3</sup>                  | 15d                   | 18 years of age and older with symptomatic asthma despite ICS treatment, alone or in combination with LABA or leukotriene modifier                                                                                                                                                                                          | Umeclidinium/fluticasone 15.6/100µg daily (DPI)<br>n=62  | 47.5 (13.8)         | 112 (31)         | <1y=2%<br>1-4y=13%<br>5-9y=17%<br>≥10=69% | 1.85 (0.53)          | 62.3 (10.3)                  | NR                                       | NR                                       |
|                                         |                       |                                                                                                                                                                                                                                                                                                                             | Umeclidinium/fluticasone 31.25/100µg daily (DPI)<br>n=60 |                     |                  |                                           |                      |                              |                                          |                                          |
|                                         |                       |                                                                                                                                                                                                                                                                                                                             | Umeclidinium/fluticasone 62.5/100µg daily (DPI)<br>n=63  |                     |                  |                                           |                      |                              |                                          |                                          |
|                                         |                       |                                                                                                                                                                                                                                                                                                                             | Umeclidinium/fluticasone 125/100µg daily (DPI)<br>n=58   |                     |                  |                                           |                      |                              |                                          |                                          |
|                                         |                       |                                                                                                                                                                                                                                                                                                                             | Umeclidinium/fluticasone 250/100µg daily (DPI)<br>n=55   |                     |                  |                                           |                      |                              |                                          |                                          |
|                                         |                       |                                                                                                                                                                                                                                                                                                                             | Fluticasone 100µg daily (DPI)<br>n=64                    |                     |                  |                                           |                      |                              |                                          |                                          |

**eTable 1. Study and population baseline characteristics for LAMA vs. placebo as add-on to ICS RCTs (Continued)**

| Study, Year                   | Duration of follow-up | Study population                                                                                                                                                                                                                                                                                                                                            | Intervention Comparisons                            | Age (y) [mean (SD)] | Males [No., (%)] | Duration of asthma (y) [mean (SD)] | FEV1 (L) [mean (SD)] | FEV1 % predicted [mean (SD)] | Rescue inhaler use (puffs/d) [mean (SD)] | ICS dose during study ( $\mu\text{g}/\text{d}$ ) [mean (SD)] |
|-------------------------------|-----------------------|-------------------------------------------------------------------------------------------------------------------------------------------------------------------------------------------------------------------------------------------------------------------------------------------------------------------------------------------------------------|-----------------------------------------------------|---------------------|------------------|------------------------------------|----------------------|------------------------------|------------------------------------------|--------------------------------------------------------------|
| Ohta, 2015 <sup>4</sup>       | 52w                   | 18-75 years of age with moderate-severe asthma according to GINA guidelines despite receiving stable medium-dose ICS (400-800 $\mu\text{g}/\text{d}$ of budesonide or equivalent) alone or fixed combination with LABA, symptomatic with ACQ-7 $\geq 1.5$ . Randomized therapy was added to continued background ICS dose with or without LABA <sup>d</sup> | Tiotropium 2.5 $\mu\text{g}$ daily (Respimat) n=114 | 44.7 (12.1)         | 53 (36.8)        | 21.0 (0.8 to 57.8) <sup>e</sup>    | NR                   | NR                           | NR                                       | 673.2 (247.4) <sup>b,f</sup>                                 |
|                               |                       |                                                                                                                                                                                                                                                                                                                                                             | Tiotropium 5 $\mu\text{g}$ daily (Respimat) n=114   | 42.6 (12.8)         | 48 (42.1)        | 21.0 (0.3 to 54.0) <sup>e</sup>    | NR                   | NR                           | NR                                       | 658.9 (220.5) <sup>b,f</sup>                                 |
|                               |                       |                                                                                                                                                                                                                                                                                                                                                             | Placebo N=57                                        | 47.8 (13.0)         | 19 (33.3)        | 26.8 (0.8 to 63.0) <sup>e</sup>    | NR                   | NR                           | NR                                       | 644.2 (220.9) <sup>b,f</sup>                                 |
| Hammelmann, 2016 <sup>6</sup> | 48w                   | 12-17 years of age with moderate symptomatic asthma with an ACQ $\geq 1.5$ receiving maintenance therapy with ICS with or without LABA or LTRA. Randomized therapy was added on to maintenance ICS dose with or without LTRA <sup>g</sup>                                                                                                                   | Tiotropium 5 $\mu\text{g}$ daily (Respimat) n=134   | 14.5 (1.6)          | 89 (66.4)        | 8.2 (4.2)                          | 2.6 (0.6)            | 77.3 (8.6)                   | NR                                       | 536 (256) <sup>b,f</sup>                                     |
|                               |                       |                                                                                                                                                                                                                                                                                                                                                             | Tiotropium 2.5 $\mu\text{g}$ daily (Respimat) n=125 | 14.2 (1.8)          | 81 (64.8)        | 7.7 (4.0)                          | 2.5 (0.6)            | 78.1 (7.9)                   | NR                                       | 557 (346) <sup>b,f</sup>                                     |
|                               |                       |                                                                                                                                                                                                                                                                                                                                                             | Placebo n=138                                       | 14.2 (1.7)          | 88 (63.8)        | 7.7 (4.2)                          | 2.6 (0.6)            | 77.6 (7.5)                   | NR                                       | 527 (275) <sup>b,f</sup>                                     |
| Paggiaro, 2016 <sup>5</sup>   | 12w                   | 18-75 years of age with mild symptomatic asthma with an ACQ $\geq 1.5$ despite receiving maintenance therapy with low-moderate ICS (200-400 $\mu\text{g}/\text{d}$ budesonide or equivalent) that is GINA step 2. Randomized therapy was added on to continued low-medium ICS dose                                                                          | Tiotropium 5 $\mu\text{g}$ daily (Respimat) n=155   | 41.9 (13.0)         | 59 (38.1)        | 15.2 (10.2)                        | 2.3 (0.6)            | 74.9 (8.1)                   | NR                                       | 376.9 (59.7) <sup>b,f</sup>                                  |
|                               |                       |                                                                                                                                                                                                                                                                                                                                                             | Tiotropium 2.5 $\mu\text{g}$ daily (Respimat) n=154 | 43.8 (14.0)         | 72 (46.8)        | 17.1 (13.0)                        | 2.3 (0.7)            | 73.2 (8.6)                   | NR                                       | 384.4 (93.4) <sup>b,f</sup>                                  |
|                               |                       |                                                                                                                                                                                                                                                                                                                                                             | Placebo n=155                                       | 42.8 (12.1)         | 52 (33.5)        | 16.2 (12.3)                        | 2.2 (0.6)            | 73.7 (8.5)                   | NR                                       | 383.0 (77.1) <sup>b,f</sup>                                  |

ACQ=Asthma Control Questionnaire; BID=twice daily; d=day(s); DPI=dry powder inhaler; FEV1=forced expiratory volume in one second; GINA=Global Initiative for Asthma; ICS=inhaled corticosteroid; L=liter; LABA=long-acting  $\beta$ -agonist; LTRA=leukotriene receptor antagonist; MDI=metered dose inhaler; n=patient sample size; NR=not reported; RCT=randomized controlled trial; SD=standard deviation; w=weeks; y=years

<sup>a</sup>Concurrent therapy during the study with leukotriene modifiers was 11.7% in the tiotropium 5 $\mu$ g daily arm, 8.8% in the tiotropium 2.5 $\mu$ g daily arm, 10.9% in the salmeterol 50 $\mu$ g BID arm and 10.8% in the placebo arm

<sup>b</sup>Data at baseline, randomized treatments were add-on to continued use of ICS

<sup>c</sup>Concurrent therapy during the study with leukotriene modifiers was 7.1% in the tiotropium 5 $\mu$ g daily arm, 9.7% in the tiotropium 2.5 $\mu$ g daily arm, 8.3% in the salmeterol 50 $\mu$ g BID arm and 7.5% in the placebo arm

<sup>d</sup>Concurrent therapies during the study in the tiotropium 2.5 $\mu$ g daily arm included LABAs (54.4%), leukotriene modifiers (31.6%) and methylxanthines (22.8%). Concurrent therapies during the study in the tiotropium 5 $\mu$ g daily arm included LABAs (57.0%), leukotriene modifiers (25.4%) and methylxanthines (16.7%). Concurrent therapies during the study in the placebo arm included LABAs (61.4%), leukotriene modifiers (24.6%) and methylxanthines (17.5%).

<sup>e</sup>Data reported as median (range)

<sup>f</sup>Budesonide equipotent dose in  $\mu$ g

<sup>g</sup>Concurrent therapy during the study with leukotriene modifiers was 11.2% in the tiotropium 5 $\mu$ g daily arm, 6.4% in the tiotropium 2.5 $\mu$ g daily arm and 10.1% in the placebo arm



**eTable 2. Study and population baseline characteristics overview for LAMA vs. other controller as add-on to ICS RCTs**

| Study, Year                  | Duration of follow-up | Study population                                                                                                                                                                                    | Intervention Comparisons                                         | Age (y) [mean (SD)] | Males [No., (%)] | Duration of asthma (yr) [mean (SD)] | FEV <sub>1</sub> (L) [mean (SD)] | FEV <sub>1</sub> % predicted [mean (SD)] | Rescue inhaler use (puffs/d) [mean (SD)] | ICS dose during study (µg/d) [mean (SD)] |
|------------------------------|-----------------------|-----------------------------------------------------------------------------------------------------------------------------------------------------------------------------------------------------|------------------------------------------------------------------|---------------------|------------------|-------------------------------------|----------------------------------|------------------------------------------|------------------------------------------|------------------------------------------|
| Peters, 2010 <sup>13</sup>   | 14w                   | ≥18 years of age with moderately severe asthma not well controlled on ICS alone. Tiotropium or salmeterol were added on to run-in dose of beclomethasone 80µg BID                                   | Tiotropium 18µg daily (Handihaler) n=210                         | 42.2 (12.3)         | 69 (32.9)        | 26.1 (14.1)                         | 2.31 (0.77)                      | 71.5 (14.9)                              | 1.71 (2.09)                              | NR                                       |
|                              |                       |                                                                                                                                                                                                     | Salmeterol 50µg BID (DPI) n=210                                  |                     | 69 (32.9)        |                                     |                                  |                                          |                                          | NR                                       |
| Bateman, 2011 <sup>1</sup>   | 16w                   | 18-65 years of age with moderate persistent asthma (GINA step 3) not controlled on ICS alone (400-1000µg/d budesonide or equivalent). Randomized therapy added on to ICS continued at prestudy dose | Tiotropium 5µg daily (Respimat) n=128                            | 43.5 (12.6)         | 46 (35.9)        | 18.1 (12.1)                         | 2.3 (0.77)                       | 74.1 (16.1)                              | NR                                       | NR                                       |
|                              |                       |                                                                                                                                                                                                     | Salmeterol 50µg BID (MDI) n=134                                  | 42.3 (13.4)         | 97 (38.1)        | 15.4 (10.7)                         | 2.4 (0.8)                        | 75.6 (17.6)                              | NR                                       | NR                                       |
| Rajanandh, 2014 <sup>7</sup> | 90d                   | 18-60 years of age with uncontrolled, mild to moderate persistent asthma according to the GINA guidelines <sup>a</sup>                                                                              | Tiotropium 18µg daily (HandiHaler) + budesonide 400µg daily n=31 | 40.4 (13.6)         | 20 (64.5)        | 5.4 (2.7)                           | NR                               | 66.9 (1.7)                               | NR                                       | NR                                       |
|                              |                       |                                                                                                                                                                                                     | Formoterol 6µg BID + budesonide 400µg daily n=32                 | 37.2 (14.9)         | 18 (56.3)        | 5.6 (2.7)                           | NR                               | 66.6 (2.0)                               | NR                                       | NR                                       |
|                              |                       |                                                                                                                                                                                                     | Doxofylline 400mg daily + budesonide 400µg daily n=30            | 37.1 (18.8)         | 11 (36.7)        | 5.2 (2.7)                           | NR                               | 66.8 (1.5)                               | NR                                       | NR                                       |
|                              |                       |                                                                                                                                                                                                     | Montelukast 10mg daily + budesonide 400µg daily n=30             | 39.3 (17.0)         | 12 (40.0)        | 5.6 (3.0)                           | NR                               | 67.2 (1.4)                               | NR                                       | NR                                       |

**eTable 2. Study and population baseline characteristics overview for LAMA vs. other controller as add-on to ICS RCTs (Continued)**

| Study, Year                             | Duration of follow-up | Study population                                                                                                                                                                                                                                                                                                            | Intervention Comparisons                   | Age (y) [mean (SD)] | Males [No., (%)] | Duration of asthma (yr) [mean (SD)] | FEV <sub>1</sub> (L) [mean (SD)] | FEV <sub>1</sub> % predicted [mean (SD)] | Rescue inhaler use (puffs/d) [mean (SD)] | ICS dose during study (μg/d) [mean (SD)] |
|-----------------------------------------|-----------------------|-----------------------------------------------------------------------------------------------------------------------------------------------------------------------------------------------------------------------------------------------------------------------------------------------------------------------------|--------------------------------------------|---------------------|------------------|-------------------------------------|----------------------------------|------------------------------------------|------------------------------------------|------------------------------------------|
| Kerstjens, 2015 <sup>2</sup><br>Study 1 | 24w                   | 18-75 year of age with moderate persistent asthma according to GINA guidelines despite treatment with stable medium dose ICS (400-800μg/d budesonide or equivalent) alone or in fixed combination with LABA, symptomatic with ACQ-7 ≥1.5. Randomized therapy was added to prestudy stable maintenance ICS dose <sup>b</sup> | Tiotropium 5μg daily (Respimat)<br>n=264   | 44.4 (12.6)         | 110 (41.7)       | 22.9 (14.7)                         | 2.2 (0.6)                        | 72.2 (8.2)                               | NR                                       | 666.4 (216.2) <sup>c</sup>               |
|                                         |                       |                                                                                                                                                                                                                                                                                                                             | Tiotropium 2.5μg daily (Respimat)<br>n=262 | 43.7 (13.1)         | 106 (40.5)       | 22.2 (14.1)                         | 2.2 (0.7)                        | 73.1 (8.6)                               | NR                                       | 649.8 (196.2) <sup>c</sup>               |
|                                         |                       |                                                                                                                                                                                                                                                                                                                             | Salmeterol 50μg BID (MDI)<br>n=275         | 42.6 (12.6)         | 116 (42.2)       | 21.4 (14.5)                         | 2.3 (0.6)                        | 72.8 (8.5)                               | NR                                       | 656.7 (193.1) <sup>c</sup>               |
| Kerstjens, 2015 <sup>2</sup><br>Study 2 | 24w                   | 18-75 year of age with moderate persistent asthma according to GINA guidelines despite treatment with stable medium dose ICS (400-800μg/d budesonide or equivalent) alone or in fixed combination with LABA, symptomatic with ACQ-7 ≥1.5. Randomized therapy was added to prestudy stable maintenance ICS dose <sup>d</sup> | Tiotropium 5μg daily (Respimat)<br>n=253   | 44.3 (12.7)         | 107 (42.3)       | 23.1 (15.3)                         | 2.3 (0.6)                        | 72.2 (8.3)                               | NR                                       | 661.3 (216.1) <sup>c</sup>               |
|                                         |                       |                                                                                                                                                                                                                                                                                                                             | Tiotropium 2.5μg daily (Respimat)<br>n=257 | 43.0 (12.6)         | 97 (37.7)        | 21.9 (14.5)                         | 2.3 (0.7)                        | 72.5 (8.0)                               | NR                                       | 662.1 (229.5) <sup>c</sup>               |
|                                         |                       |                                                                                                                                                                                                                                                                                                                             | Salmeterol 50μg BID (MDI)<br>n=266         | 41.5 (13.1)         | 113 (42.5)       | 20.4 (14.1)                         | 2.4 (0.7)                        | 73.1 (8.1)                               | NR                                       | 644.7 (217.2) <sup>c</sup>               |

**eTable 2. Study and population baseline characteristics overview for LAMA vs. other controller as add-on to ICS RCTs (Continued)**

| Study, Year            | Duration of follow-up | Study population                                                                                                                   | Intervention Comparisons                                 | Age (y) [mean (SD)] | Males [No., (%)] | Duration of asthma (yr) [mean (SD)]       | FEV <sub>1</sub> (L) [mean (SD)] | FEV <sub>1</sub> % predicted [mean (SD)] | Rescue inhaler use (puffs/d) [mean (SD)] | ICS dose during study (µg/d) [mean (SD)] |
|------------------------|-----------------------|------------------------------------------------------------------------------------------------------------------------------------|----------------------------------------------------------|---------------------|------------------|-------------------------------------------|----------------------------------|------------------------------------------|------------------------------------------|------------------------------------------|
| Lee, 2015 <sup>3</sup> | 15d                   | 18 years of age and older with symptomatic asthma despite ICS treatment, alone or in combination with LABA or leukotriene modifier | Umeclidinium/fluticasone 15.6/100µg daily (DPI)<br>n=62  | 47.5 (13.8)         | 112 (31)         | <1y=2%<br>1-4y=13%<br>5-9y=17%<br>≥10=69% | 1.85 (0.53)                      | 62.3 (10.3)                              | NR                                       | NR                                       |
|                        |                       |                                                                                                                                    | Umeclidinium/fluticasone 31.25/100µg daily (DPI)<br>n=60 |                     |                  |                                           |                                  |                                          |                                          |                                          |
|                        |                       |                                                                                                                                    | Umeclidinium/fluticasone 62.5/100µg daily (DPI)<br>n=63  |                     |                  |                                           |                                  |                                          |                                          |                                          |
|                        |                       |                                                                                                                                    | Umeclidinium/fluticasone 125/100µg daily (DPI)<br>n=58   |                     |                  |                                           |                                  |                                          |                                          |                                          |
|                        |                       |                                                                                                                                    | Umeclidinium/fluticasone 250/100µg daily (DPI)<br>n=55   |                     |                  |                                           |                                  |                                          |                                          |                                          |
|                        |                       |                                                                                                                                    | Vilanterol/fluticasone 125/100µg daily (DPI)<br>n=59     |                     |                  |                                           |                                  |                                          |                                          |                                          |

**eTable 2. Study and population baseline characteristics overview for LAMA vs. other controller as add-on to ICS RCTs (Continued)**

| Study, Year                  | Duration of follow-up | Study population                                                                                                                                                                            | Intervention Comparisons                                            | Age (y) [mean (SD)] | Males [No., (%)] | Duration of asthma (yr) [mean (SD)] | FEV <sub>1</sub> (L) [mean (SD)] | FEV <sub>1</sub> % predicted [mean (SD)] | Rescue inhaler use (puffs/d) [mean (SD)] | ICS dose during study (µg/d) [mean (SD)] |
|------------------------------|-----------------------|---------------------------------------------------------------------------------------------------------------------------------------------------------------------------------------------|---------------------------------------------------------------------|---------------------|------------------|-------------------------------------|----------------------------------|------------------------------------------|------------------------------------------|------------------------------------------|
| Rajanandh, 2015 <sup>8</sup> | 180d                  | 18-60 years of age with uncontrolled, mild-moderate persistent asthma according to GINA guidelines <sup>a</sup>                                                                             | Tiotropium 18µg daily (Handihaler) + budesonide 400µg daily<br>n=72 | 37.4 (13.6)         | 38 (52.8)        | 5.8 (8.7)                           | NR                               | 66.1 (6.4)                               | 4.4 (1.1)                                | NR                                       |
|                              |                       |                                                                                                                                                                                             | Formoterol 6µg BID + budesonide 400µg daily<br>n=68                 | 38.4 (14.9)         | 38 (55.4)        | 6.6 (6.7)                           | NR                               | 66.2 (8.3)                               | 4.4 (1.1)                                | NR                                       |
|                              |                       |                                                                                                                                                                                             | Montelukast 10mg daily + budesonide 400µg daily<br>n=81             | 36.3 (17.0)         | 36 (44.4)        | 5.9 (8.0)                           | NR                               | 67.2 (6.5)                               | 4.5 (1.2)                                | NR                                       |
|                              |                       |                                                                                                                                                                                             | Doxofylline 400mg daily + budesonide 400µg daily<br>n=76            | 38.3 (18.8)         | 41 (53.9)        | 6.2 (9.7)                           | NR                               | 66.3 (7.0)                               | 4.5 (1.1)                                | NR                                       |
| Wechsler, 2015 <sup>9</sup>  | 18m                   | 18-75 years of age with asthma currently on or eligible for step 3 or 4 combination ICS/LABA according to the NHLBI guidelines. Randomized therapy was added to continued baseline ICS dose | Tiotropium 18µg daily (HandiHaler)<br>n=532                         | 45.2 (12.6)         | 127 (23.9)       | 23.3 (15.8)                         | 2.1 (0.7)                        | 78.6 (17.6)                              | 3.4 (3.5)                                | NR <sup>f</sup>                          |
|                              |                       |                                                                                                                                                                                             | LABA BID <sup>e</sup><br>n=538                                      | 45.1 (12.6)         | 130 (24.2)       | 25.6 (16.0)                         | 2.1 (0.6)                        | 78.7 (18.6)                              | 3.5 (3.7)                                | NR <sup>f</sup>                          |

Abbreviations: ACQ=Asthma Control Questionnaire; BID=twice daily; d=day; DPI=dry powder inhaler; FEV<sub>1</sub>=forced expiratory volume in one second; GINA=Global Initiative for Asthma; ICS=inhaled corticosteroid; L=liter; LABA=long-acting β<sub>2</sub>-agonist; =months; MDI=metered dose inhaler; n=patient sample size; NHLBI=National Heart, Lung, and Blood Institute; NR=not reported; RCT=randomized controlled trial; SD=standard deviation; µg=microgram; w=week; y=year

<sup>a</sup>Confirmed through author correspondence

<sup>b</sup>Concurrent therapy during the study with leukotriene modifiers was 11.7% in the tiotropium 5µg daily arm, 8.8% in the tiotropium 2.5µg daily arm, 10.9% in the salmeterol 50µg BID arm and 10.8% in the placebo arm

<sup>c</sup>Data at baseline, randomized treatments were add-on to continued use of ICS

<sup>d</sup>Concurrent therapy during the study with leukotriene modifiers was 7.1% in the tiotropium 5µg daily arm, 9.7% in the tiotropium 2.5µg daily arm, 8.3% in the salmeterol 50µg BID arm and 7.5% in the placebo arm

<sup>e</sup>Either salmeterol 50µg or formoterol 9µg BID, based on baseline usage of LABA. 116/538 (21.6%) for formoterol & 422/538 (78.4%) for salmeterol

<sup>f</sup>Mean/median ICS dose was not reported, although patients continued baseline ICS dose. Of those taking an ICS without LABA at baseline (28%), 88% were taking low-dose ICS <500µg. Of those taking ICS+LABA, 70% were using a single inhaler to delivery both medications. Approximately half were taking fluticasone/salmeterol 250/50µg

**eTable 3. Study and population baseline characteristics for LAMA added to ICS and LABA vs. ICS and LABA RCTs**

| Study, Year                              | Duration of follow-up | Study population                                                                                                                                                                                                                                                                                                                           | Intervention Comparisons                                                | Age (y) [mean (SD)]      | Males [No., (%)] | Duration of asthma (y) [mean (SD)] | FEV1 (L) [mean (SD)] | FEV1 % predicted [mean (SD)] | Rescue inhaler use (puffs/d) [mean (SD)] | ICS dose during study ( $\mu\text{g}/\text{d}$ ) [mean (SD)] |
|------------------------------------------|-----------------------|--------------------------------------------------------------------------------------------------------------------------------------------------------------------------------------------------------------------------------------------------------------------------------------------------------------------------------------------|-------------------------------------------------------------------------|--------------------------|------------------|------------------------------------|----------------------|------------------------------|------------------------------------------|--------------------------------------------------------------|
| Kerstjens, 2012 <sup>10</sup><br>Study 1 | 48w                   | 18-75 years of age with severe persistent, symptomatic asthma & ACQ-7 $\geq 1.5$ despite daily ICS ( $\geq 800\mu\text{g}$ budesonide or equivalent per day) and LABA therapy. Randomized therapy added on to pretrial maintenance high-dose ICS and LABA. Other maintenance medications allowed to continue at stable doses. <sup>a</sup> | Tiotropium 5 $\mu\text{g}$ daily (Respimat) n=237                       | 52.9 (12.4)              | 91 (38.4)        | 31 (6 to 70) <sup>b</sup>          | 1.60 (0.55)          | 54.6 (12.2)                  | 2.8 (NR)                                 | 800 (800-1600) <sup>c,d,e</sup>                              |
|                                          |                       |                                                                                                                                                                                                                                                                                                                                            | Placebo n=222                                                           | 53.9 (12.8)              | 79 (35.6)        | 28 (6 to 68) <sup>b</sup>          | 1.56 (0.54)          | 54.6 (12.2)                  | 3.3 (NR)                                 |                                                              |
| Kerstjens, 2012 <sup>10</sup><br>Study 2 | 48w                   | 18-75 years of age with severe persistent, symptomatic asthma & ACQ-7 $\geq 1.5$ despite daily ICS ( $\geq 800\mu\text{g}$ budesonide or equivalent per day) and LABA therapy. Randomized therapy added on to pretrial maintenance high-dose ICS and LABA; Other maintenance medications allowed to continue at stable doses. <sup>f</sup> | Tiotropium 5 $\mu\text{g}$ daily (Respimat) n=219                       | 51.4 (12.5)              | 92 (42.0)        | 26 (5 to 72) <sup>b</sup>          | 1.66 (0.57)          | 55.1 (12.8)                  | 3.4 (NR)                                 | 800 (800-1600) <sup>c,d,e</sup>                              |
|                                          |                       |                                                                                                                                                                                                                                                                                                                                            | Placebo n=234                                                           | 53.6 (11.7)              | 99 (42.3)        | 28 (5 to 69) <sup>b</sup>          | 1.60 (0.51)          | 55.0 (12.6)                  | 3.3 (NR)                                 |                                                              |
| Wang, 2015 <sup>11</sup>                 | 12w                   | Adults with moderate persistent asthma according to GINA guidelines, uncontrolled on salmeterol/ fluticasone 50/250 $\mu\text{g}$ BID with daily symptoms and use of SABA. Tiotropium was added on to continued salmeterol/fluticasone 50/250 $\mu\text{g}$ BID                                                                            | Tiotropium 18 $\mu\text{g}$ daily (HandiHaler) n=33                     | 36.7 (5.79) <sup>g</sup> | 18 (54.5)        | NR                                 | NR                   | NR                           | NR                                       | 500 <sup>h</sup>                                             |
|                                          |                       |                                                                                                                                                                                                                                                                                                                                            | Increase salmeterol /fluticasone to 50/500 $\mu\text{g}$ BID (DPI) n=30 | 35.3 (5.89) <sup>g</sup> | 16 (53.3)        | NR                                 | NR                   | NR                           | NR                                       | NR                                                           |

**eTable 3. Study and population baseline characteristics for LAMA added to ICS and LABA vs. ICS and LABA RCTs (Continued)**

| Study, Year                   | Duration of follow-up | Study population                                                                                                                                                                                                                                                                                                                                                                                                                                     | Intervention Comparisons                | Age (y) [mean (SD)] | Males [No., (%)] | Duration of asthma (y) [mean (SD)] | FEV1 (L) [mean (SD)] | FEV1 % predicted [mean (SD)] | Rescue inhaler use (puffs/d) [mean (SD)] | ICS dose during study (µg/d) [mean (SD)] |
|-------------------------------|-----------------------|------------------------------------------------------------------------------------------------------------------------------------------------------------------------------------------------------------------------------------------------------------------------------------------------------------------------------------------------------------------------------------------------------------------------------------------------------|-----------------------------------------|---------------------|------------------|------------------------------------|----------------------|------------------------------|------------------------------------------|------------------------------------------|
| Hamelmann, 2017 <sup>12</sup> | 12w                   | 12-17 years of age with severe persistent asthma according to GINA guidelines despite high-dose ICS (>400µg/d in 12-14y, >800-1600µg/d of budesonide equivalent if >14y) with another controller OR medium dose ICS (200-400µg/d budesonide equivalent in 12-14y, 400-800µg/d in >14y) with two other controllers; Symptomatic with ACQ-7 ≥1.5. Randomized therapies were added on to ICS and other controllers used prior to the study <sup>1</sup> | Tiotropium 5µg daily (Respimat) n=130   | 14.3 (1.6)          | 83 (63.8)        | 7.3 (4.0)                          | 2.6 (0.7)            | 79.4 (12.3)                  | NR                                       | 776.7 (381.2) <sup>d,e</sup>             |
|                               |                       |                                                                                                                                                                                                                                                                                                                                                                                                                                                      | Tiotropium 2.5µg daily (Respimat) n=127 | 14.4 (1.8)          | 80 (63.0)        | 8.0 (3.9)                          | 2.5 (0.6)            | 79.8 (9.9)                   | NR                                       | 727.8 (343.6) <sup>d,e</sup>             |
|                               |                       |                                                                                                                                                                                                                                                                                                                                                                                                                                                      | Placebo n=135                           | 14.1 (1.7)          | 79 (58.5)        | 8.0 (3.7)                          | 2.5 (0.6)            | 79.4 (12.2)                  | NR                                       | 736.6 (347.9) <sup>d,e</sup>             |

Abbreviations: ACQ=Asthma Control Questionnaire; BID=twice daily; d=day; DPI=dry powder inhaler; FEV1=forced expiratory volume in one second; GINA=Global Initiative for Asthma; ICS=inhaled corticosteroid; L=liter; LABA=long-acting β<sub>2</sub>-agonist; LAMA=long-acting muscarinic antagonist; n=patient sample size; NR=not reported; RCT=randomized controlled trial; SABA=short-acting β-agonist; SD=standard deviation; µg=microgram; w=week; y=year

<sup>a</sup>Concurrent therapies during the study in the tiotropium arm included leukotriene modifiers (25.3%), theophylline (18.6%), omalizumab (2.5%), systemic steroids (6.8%) and antihistamines (20.3%). Concurrent therapies during the study in the placebo arm included leukotriene modifiers (27.5%), theophylline (21.2%), omalizumab (4.5%), systemic steroids (5.0%) and antihistamines (16.2%)

<sup>b</sup>Data reported as median (range)

<sup>c</sup>Data reported as median (interquartile range)

<sup>d</sup>Data at baseline, randomized treatments were added on to continued use of ICS

<sup>e</sup>Budesonide equipotent dose in µg

<sup>f</sup>Concurrent therapies during the study in the tiotropium arm included leukotriene modifiers (16.4%), theophylline (14.2%), omalizumab (2.7%), systemic steroids (3.7%) and antihistamines (14.2%). Concurrent therapies during the study in the placebo arm included leukotriene modifiers (19.7%), theophylline (12.8%), omalizumab (6.0%), systemic steroids (5.6%) and antihistamines (8.1%)

<sup>g</sup>Data reported as mean (standard error)

<sup>h</sup>ICS dose assumed due to fixed dosing with add-on therapy (tiotropium arm) or increased dose (salmeterol/fluticasone arm) used in trial

<sup>i</sup>Concurrent therapies during the treatment period in the tiotropium 5µg arm were systemic corticosteroids (3%), short acting anticholinergic (0.8%), long-acting β<sub>2</sub>-agonists (82.3%), theophylline (6.2%) and leukotriene modifiers (78.5%). In this arm, 33.1% of patients were on 2 controllers while 66.9% were on three controllers. Concurrent therapies during the treatment period in the tiotropium 2.5µg arm were systemic corticosteroids (0.8%), long-acting β<sub>2</sub>-agonists (79.5%), theophylline (4.7%) and leukotriene modifiers (81.9%). In this arm, 33.9% of patients were on 2 controllers while 66.1% were on three controllers. Concurrent therapies during the treatment period in the placebo arm were systemic corticosteroids (1.5%), long-acting β<sub>2</sub>-agonists (85.9%), theophylline (5.2%) and leukotriene modifiers (80.7%). In this arm, 28.2% of patients were on 2 controllers while 71.9% were on three controllers

**eTable 4. Subgroup analysis for tiotropium dose**

| Outcome                                            | Reference No. for Included Studies | No. of Participants <sup>a</sup> |               | Results                                           |                                   |
|----------------------------------------------------|------------------------------------|----------------------------------|---------------|---------------------------------------------------|-----------------------------------|
|                                                    |                                    | LAMA Group                       | Control Group | Absolute Risk Difference, % (95% CI) <sup>b</sup> | Effect Size (95% CI) <sup>c</sup> |
| <b>Tiotropium vs. placebo (base case analysis)</b> |                                    |                                  |               |                                                   |                                   |
| Exacerbation requiring systemic corticosteroid     | 1-3,6,7                            | 86/2030                          | 74/1006       | -1.8 (-3.8 to 0.3)                                | RR 0.67 (0.48 to 0.92)            |
| Asthma worsening <sup>d</sup>                      | 2,5,6                              | 356/1604                         | 223/816       | -4.8 (-10.4 to 0.8)                               | RR 0.81 (0.68 to 0.97)            |
| ACQ-7 score <sup>e</sup>                           | 2,5,6                              | 1527                             | 777           | NA                                                | MD -0.10 (-0.28 to 0.07)          |
| ACQ-7 responder <sup>f</sup>                       | 2,4-6                              | 1217/1816                        | 527/864       | 5.2 (-2.2 to 12.6)                                | RR 1.08 (0.96 to 1.21)            |
| FEV1 peak, L                                       | 2,5,6                              | 1527                             | 783           | NA                                                | MD 0.18 (0.13 to 0.24)            |
| FEV1 trough, L                                     | 1-6                                | 2154                             | 1019          | NA                                                | MD 0.13 (0.10 to 0.17)            |
| FEV1 AUC, L                                        | 2,5,6                              | 1527                             | 783           | NA                                                | MD 0.18 (0.13 to 0.23)            |
| FVC peak, L                                        | 2,6                                | 1224                             | 629           | NA                                                | MD 0.11 (0.05 to 0.18)            |
| FVC trough, L                                      | 1,2,4,6                            | 1580                             | 810           | NA                                                | MD 0.08 (0.04 to 0.13)            |
| FVC AUC, L                                         | 2,6                                | 1230                             | 629           | NA                                                | MD 0.11 (0.05 to 0.17)            |
| Rescue medication use, puffs/24 hours              | 1-6                                | 2110                             | 994           | NA                                                | MD -0.08 (-0.23 to 0.07)          |
| <b>Tiotropium 2.5µg vs. placebo</b>                |                                    |                                  |               |                                                   |                                   |
| Exacerbation requiring systemic corticosteroid     | 2,5,6                              | 33/798                           | 56/816        | -1.9 (-8.9 to 5.2)                                | RR 0.63 (0.20 to 2.04)            |
| Asthma worsening <sup>d</sup>                      | 2,5,6                              | 170/798                          | 186/806       | -4.1 (-17.7 to 9.6)                               | RR 0.82 (0.49 to 1.38)            |
| ACQ-7 score <sup>e</sup>                           | 2,5,6                              | 761                              | 777           | NA                                                | MD -0.12 (-0.35 to 0.11)          |
| ACQ-7 responder <sup>f</sup>                       | 2,4-6                              | 603/903                          | 527/864       | 5.4 (-1.0 to 11.7)                                | RR 1.08 (0.98 to 1.20)            |
| FEV1 peak, L                                       | 2,5,6                              | 763                              | 783           | NA                                                | MD 0.20 (0.13 to 0.27)            |
| FEV1 trough, L                                     | 2,4-6                              | 877                              | 839           | NA                                                | MD 0.12 (0.03 to 0.21)            |
| FEV1 AUC, L                                        | 2,5,6                              | 763                              | 783           | NA                                                | MD 0.19 (0.12 to 0.25)            |
| FVC peak, L                                        | 2,6                                | 612                              | 629           | NA                                                | MD 0.13 (0.03 to 0.24)            |
| FVC trough, L                                      | 2,4,6                              | 726                              | 685           | NA                                                | MD 0.07 (-0.04 to 0.18)           |
| FVC AUC, L                                         | 2,6                                | 612                              | 629           | NA                                                | MD 0.13 (0.04 to 0.21)            |
| Rescue medication use, puffs/24 hours              | 2,4-6                              | 848                              | 805           | NA                                                | MD -0.09 (-0.34 to 0.16)          |
| <b>Tiotropium 5µg vs. placebo</b>                  |                                    |                                  |               |                                                   |                                   |
| Exacerbation requiring systemic corticosteroid     | 1,2,5,6                            | 50/806                           | 73/942        | -2.5 (-4.6 to -0.4)                               | RR 0.69 (0.32 to 1.47)            |
| Asthma worsening <sup>d</sup>                      | 2,5,6                              | 186/806                          | 223/816       | -4.5 (-7.4 to -1.6)                               | RR 0.85 (0.63 to 1.15)            |
| ACQ-7 score <sup>e</sup>                           | 2,5,6                              | 766                              | 777           | NA                                                | MD -0.09 (-0.23 to 0.06)          |
| ACQ-7 responder <sup>f</sup>                       | 2,4-6                              | 614/913                          | 527/864       | 5.4 (-3.4 to 14.1)                                | RR 1.08 (0.95 to 1.24)            |
| FEV1 peak, L                                       | 2,5,6                              | 764                              | 783           | NA                                                | MD 0.17 (0.13 to 0.21)            |
| FEV1 trough, L                                     | 1,2,4-6                            | 1006                             | 964           | NA                                                | MD 0.13 (0.12 to 0.15)            |
| FEV1 AUC, L                                        | 2,5,6                              | 764                              | 783           | NA                                                | MD 0.17 (0.12 to 0.21)            |
| FVC peak, L                                        | 2,6                                | 613                              | 629           | NA                                                | MD 0.09 (0.06 to 0.12)            |
| FVC trough, L                                      | 1,2,4,6                            | 854                              | 810           | NA                                                | MD 0.08 (0.05 to 0.12)            |
| FVC AUC, L                                         | 2,6                                | 618                              | 629           | NA                                                | MD 0.09 (0.05 to 0.13)            |
| Rescue medication use, puffs/24 hours              | 1,2,4-6                            | 978                              | 930           | NA                                                | MD -0.03 (-0.22 to 0.16)          |
| <b>Tiotropium 2.5µg vs. 5µg</b>                    |                                    |                                  |               |                                                   |                                   |
| Exacerbation requiring systemic corticosteroid     | 2,5,6                              | 33/798                           | 34/806        | 1.2 (-5.8 to 8.1)                                 | RR 1.70 (0.11 to 25.55)           |
| Asthma worsening <sup>d</sup>                      | 2,5,6                              | 170/798                          | 186/806       | 0.9 (-14.8 to 16.6)                               | RR 1.08 (0.45 to 2.57)            |
| ACQ-7 score <sup>e</sup>                           | 2,5,6                              | 761                              | 766           | NA                                                | MD -0.03 (-0.16 to 0.10)          |



**eTable 4. Subgroup analysis for tiotropium dose (Continued)**

| Outcome                               | Reference No. for Included Studies | No. of Participants |               | Results                                           |                          |
|---------------------------------------|------------------------------------|---------------------|---------------|---------------------------------------------------|--------------------------|
|                                       |                                    | LAMA Group          | Control Group | Absolute Risk Difference, % (95% CI) <sup>b</sup> | Effect Size (95% CI)     |
| ACQ-7 responder <sup>f</sup>          | 2,4-6                              | 603/903             | 614/913       | -0.5 (-5.7 to 4.7)                                | RR 0.99 (0.92 to 1.07)   |
| FEV1 peak, L                          | 2,5,6                              | 763                 | 764           | NA                                                | MD 0.03 (-0.01 to 0.07)  |
| FEV1 trough, L                        | 2,4-6                              | 877                 | 878           | NA                                                | MD -0.01 (-0.08 to 0.06) |
| FEV1 AUC, L                           | 2,5,6                              | 763                 | 764           | NA                                                | MD 0.02 (-0.02 to 0.07)  |
| FVC peak, L                           | 2,6                                | 612                 | 612           | NA                                                | MD 0.04 (-0.04 to 0.12)  |
| FVC trough, L                         | 2,4,6                              | 726                 | 726           | NA                                                | MD -0.01 (-0.13 to 0.11) |
| FVC AUC, L                            | 2,6                                | 612                 | 618           | NA                                                | MD 0.03 (-0.02 to 0.08)  |
| Rescue medication use, puffs/24 hours | 2,4-6                              | 848                 | 850           | NA                                                | MD -0.08 (-0.37 to 0.20) |

Abbreviations: ACQ=Asthma Control Questionnaire; AUC=area under curve; CI=confidence interval; FVC=forced vital capacity; FEV1=forced expiratory volume in one second; MD=mean difference; RD=risk difference; RR=relative risk

<sup>a</sup> Data are presented as number of participants with an event over the total number of participants in the group.

<sup>b</sup> Data are presented as absolute risk differences (risk in LAMA group minus risk in Control group) between groups.

<sup>c</sup> For continuous outcomes, the mean difference (MD) value represents the difference in change scores (change from baseline) between the LAMA and Control groups.

<sup>d</sup> Asthma worsening was defined by studies as a progressive increase in asthma symptoms compared to day-to-day symptoms or a decrease in morning peak expiratory flow (PEF)  $\geq 30\%$  for 2 or more days.

<sup>e</sup> ACQ (range 0 [worse] to 6 [better control]) is a patient self-administered tool for assessing overall asthma control. The minimal important difference is a 0.5 point change.<sup>14</sup>

<sup>f</sup> ACQ responder was defined as an individual who had their score improve by at least 0.5 of greater.<sup>15</sup>

**eTable 5. Sensitivity Analyses Removing Studies with High Risk of Bias**

| Outcome                               | Reference No. for Included Studies | Basecase Analyses                                | Low Risk of Bias Analyses                 |
|---------------------------------------|------------------------------------|--------------------------------------------------|-------------------------------------------|
|                                       |                                    | Results Effect Size (95% CI) <sup>a</sup>        | Results Effect Size (95% CI) <sup>b</sup> |
| <b>LAMA vs. LABA as add-on to ICS</b> |                                    |                                                  |                                           |
| <i>Death</i>                          |                                    |                                                  |                                           |
| All-cause                             | 2,3,9                              | OR 7.50 (0.78 to 72.27)<br>RD 0.1 (-0.3 to 0.6)  | No deaths occurred                        |
| Asthma-specific                       | 2,3,9                              | OR 7.49 (0.47 to 119.86)<br>RD 0.1 (-0.2 to 0.4) | No deaths occurred                        |
| <i>Spirometry</i>                     |                                    |                                                  |                                           |
| FEV1 trough, L                        | 1-3,9,13                           | MD 0.02 (-0.02 to 0.07)                          | MD 0.03 (-0.03 to 0.08)                   |
| FEV1 % predicted                      | 7-9                                | MD -4.54 (-12.69 to 3.61)                        | NA (All-studies had a high risk of bias)  |
| <i>Asthma-related QOL</i>             |                                    |                                                  |                                           |
| AQLQ score                            | 2,9,13                             | MD -0.06 (-0.15 to 0.03)                         | MD -0.07 (-0.16 to 0.02)                  |
| <i>Health Resource Utilization</i>    |                                    |                                                  |                                           |
| Rescue medication use, puffs/24h      | 1-3,7-9                            | MD 0.63 (-0.11 to 1.36)                          | MD 0.23 (-0.05 to 0.51)                   |

Abbreviations: ACQ-5, 5-item Asthma Control Questionnaire; CI, confidence interval; ER, emergency room; FEV1, forced expiratory volume in one second; ICS, inhaled corticosteroid; LABA, long-acting beta agonist; MD, mean difference; OR, odds ratio; RD, risk difference; RR, risk ratio

<sup>a</sup> Risk difference data are presented as absolute risk differences (risk in LAMA group minus risk in Control group) between groups.

<sup>b</sup> For continuous outcomes, the mean difference (MD) value represents the difference in change scores (change from baseline) between the LAMA and Control groups.

**eFigure 1. Assessment of Risk of Bias Using Cochrane Collaboration Tool**

|                                | Random sequence generation (selection bias) | Allocation concealment (selection bias) | Blinding of participants and personnel (performance bias) | Blinding of outcome assessment (detection bias) | Incomplete outcome data (attrition bias) | Selective reporting (reporting bias) | Other bias |
|--------------------------------|---------------------------------------------|-----------------------------------------|-----------------------------------------------------------|-------------------------------------------------|------------------------------------------|--------------------------------------|------------|
| Peters, 2010 <sup>28</sup>     | ?                                           | ?                                       | +                                                         | +                                               | +                                        | +                                    | +          |
| Bateman, 2011 <sup>16</sup>    | +                                           | +                                       | +                                                         | +                                               | +                                        | +                                    | +          |
| Kerstjens, 2012a <sup>25</sup> | +                                           | +                                       | +                                                         | +                                               | +                                        | +                                    | +          |
| Kerstjens, 2012a <sup>25</sup> | +                                           | +                                       | +                                                         | +                                               | +                                        | +                                    | +          |
| Rajanandh, 2014 <sup>22</sup>  | +                                           | +                                       | -                                                         | -                                               | -                                        | ?                                    | +          |
| Kerstjens, 2015a <sup>17</sup> | +                                           | +                                       | +                                                         | +                                               | +                                        | +                                    | +          |
| Kerstjens, 2015b <sup>17</sup> | +                                           | +                                       | +                                                         | +                                               | +                                        | +                                    | +          |
| Lee, 2015 <sup>18</sup>        | +                                           | +                                       | ?                                                         | ?                                               | +                                        | +                                    | +          |
| Ohta, 2015 <sup>19</sup>       | +                                           | +                                       | +                                                         | +                                               | +                                        | +                                    | +          |
| Rajanandh, 2015 <sup>23</sup>  | +                                           | +                                       | -                                                         | -                                               | +                                        | ?                                    | +          |
| Wang, 2015 <sup>26</sup>       | ?                                           | ?                                       | ?                                                         | ?                                               | +                                        | ?                                    | +          |
| Wechsler, 2015 <sup>24</sup>   | +                                           | +                                       | -                                                         | +                                               | +                                        | +                                    | +          |
| Hamelmann, 2016 <sup>21</sup>  | +                                           | ?                                       | +                                                         | +                                               | +                                        | +                                    | +          |
| Paggiaro, 2016 <sup>20</sup>   | +                                           | +                                       | +                                                         | +                                               | +                                        | +                                    | +          |
| Kerstjens, 2017 <sup>27</sup>  | +                                           | +                                       | +                                                         | +                                               | +                                        | +                                    | +          |

**Legend:**  Low risk of bias  High risk of bias  Unclear risk of bias

**eFigure 2. Summative Assessment of Risk of Bias (No. Studies = 15)**

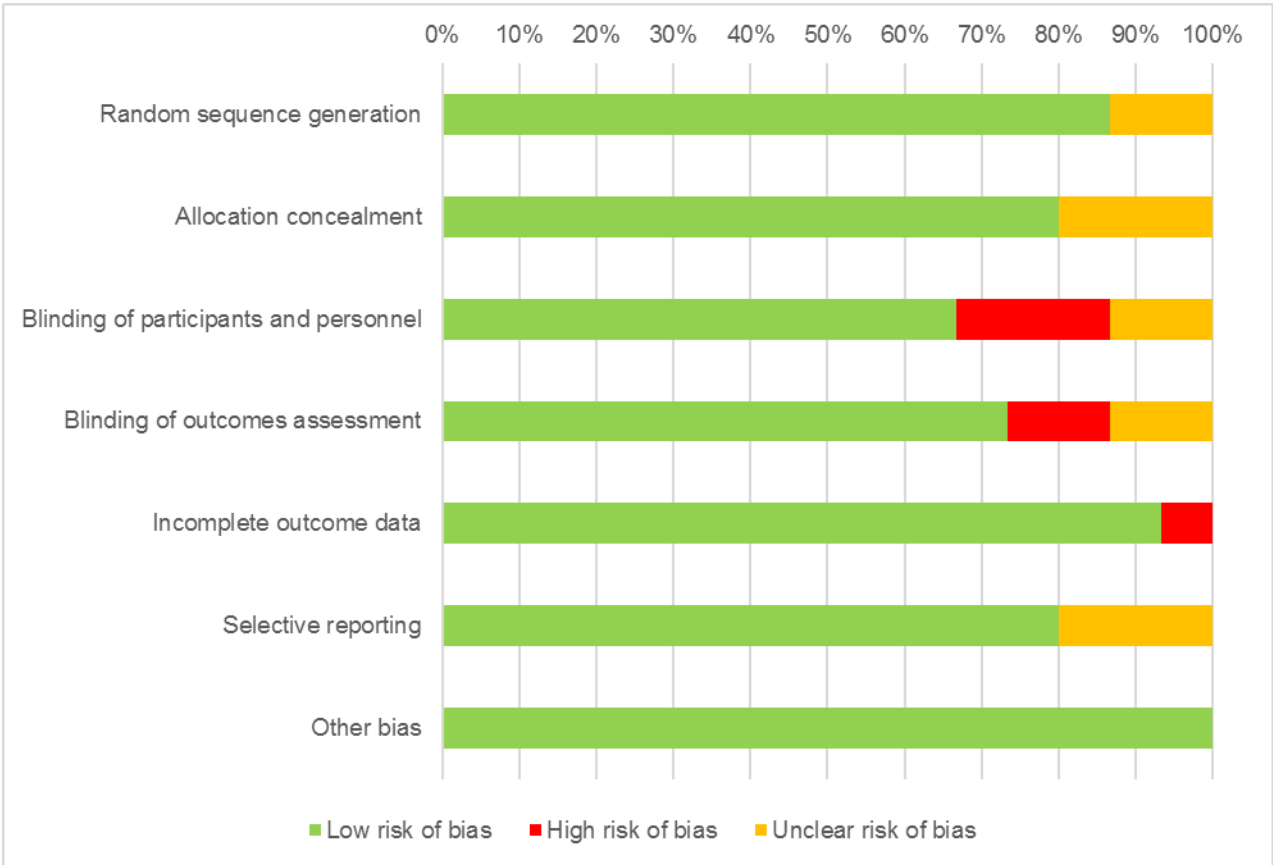

### eFigure 3. Asthma worsening

Box sizes are proportional to study weight (box center positioned at point estimate of effect). Horizontal lines indicate 95% CIs. The  $I^2$  value indicates the percentage of variability across the pooled estimates attributable to statistical heterogeneity (range 0-100%), and the p-value is a test of heterogeneity across all studies (p value < 0.10 indicates likely variation across pooled estimates related to statistical heterogeneity). Asthma worsening was defined by studies as a progressive increase in asthma symptoms compared to day-to-day symptoms or a decrease in morning peak expiratory flow (PEF)  $\geq 30\%$  for 2 or more days. The term “Events” refers to the number of participants in each arm who experienced an event.

Abbreviations: CI, confidence interval; ICS, inhaled corticosteroid; LABA, long-acting beta agonist; LAMA, long-acting muscarinic antagonist; RR, risk ratio

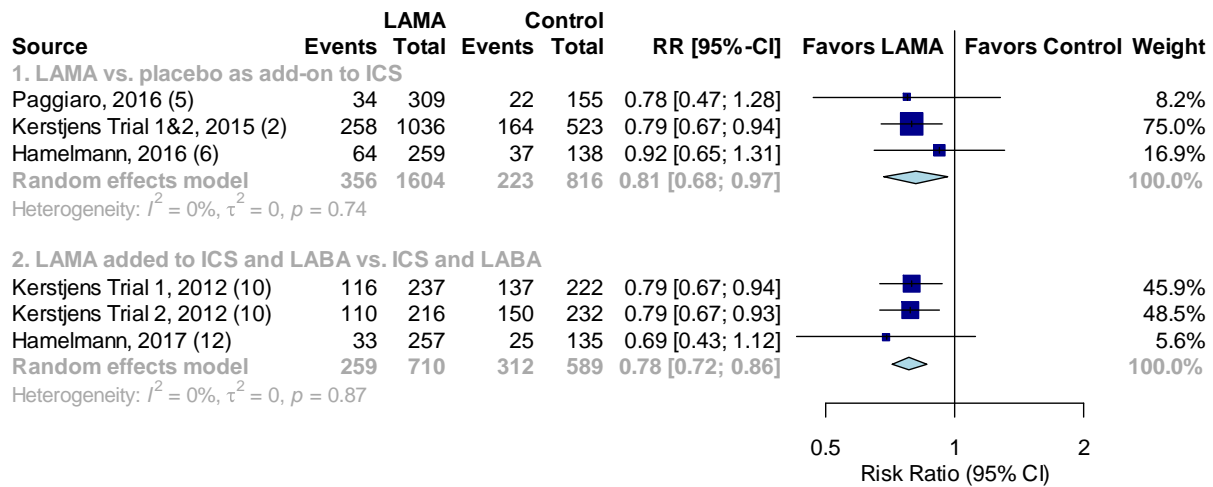

### eFigure 4. ACQ-7 responder

Box sizes are proportional to study weight (box center positioned at point estimate of effect). Horizontal lines indicate 95% CIs. The  $I^2$  value indicates the percentage of variability across the pooled estimates attributable to statistical heterogeneity (range 0-100%), and the p-value is a test of heterogeneity across all studies (p value < 0.10 indicates likely variation across pooled estimates related to statistical heterogeneity). ACQ responder was defined as an individual who had their score improve by at least 0.5 of greater.<sup>15</sup> The term “Events” refers to the number of participants in each arm who experienced an event.

Abbreviations: ACQ, asthma control questionnaire; CI, confidence interval; ICS, inhaled corticosteroid; LAMA, long-acting muscarinic antagonist; RR, risk ratio

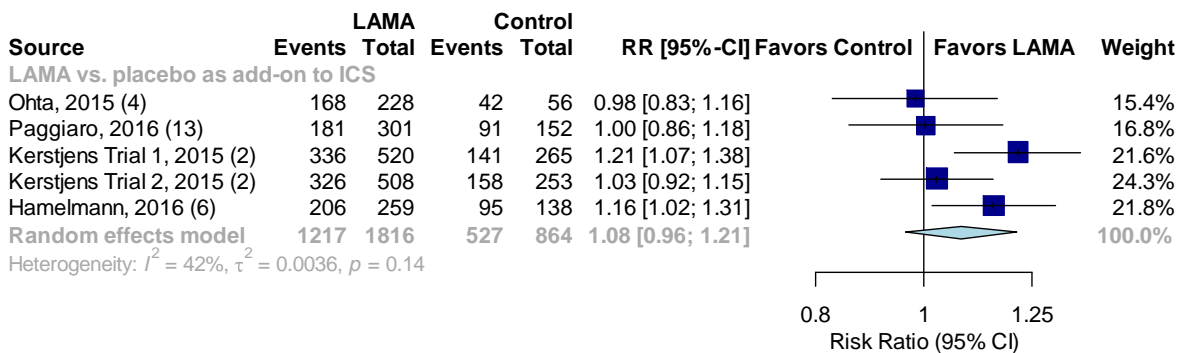

## eFigure 5. FEV1 peak (L)

Box sizes are proportional to study weight (box center positioned at point estimate of effect). The mean value represents the mean change from baseline (change score) for each study group and the mean difference (MD) value represents the difference in change scores (change from baseline) between the LAMA and Control groups. Horizontal lines indicate 95% CIs. The  $I^2$  value indicates the percentage of variability across the pooled estimates attributable to statistical heterogeneity (range 0-100%), and the p-value is a test of heterogeneity across all studies (p value < 0.10 indicates likely variation across pooled estimates related to statistical heterogeneity). A minimally important change in FEV1 was defined as an increase or decrease of 0.2 liters or more.<sup>15</sup>

Abbreviations: CI, confidence interval; FEV1, forced expiratory volume in 1 second; ICS, inhaled corticosteroid; LABA, long-acting beta-agonist; LAMA, long-acting muscarinic antagonist; MD, mean difference; SD, standard deviation

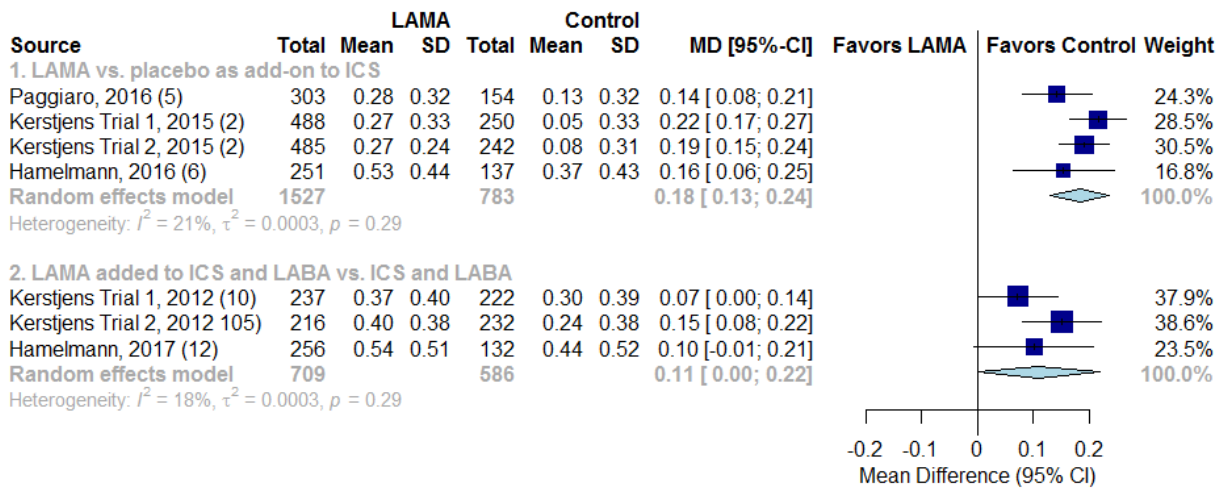

## eFigure 6. FEV1 AUC (L)

Box sizes are proportional to study weight (box center positioned at point estimate of effect). The mean value represents the mean change from baseline (change score) for each study group and the mean difference (MD) value represents the difference in change scores (change from baseline) between the LAMA and Control groups. Horizontal lines indicate 95% CIs. The  $I^2$  value indicates the percentage of variability across the pooled estimates attributable to statistical heterogeneity (range 0-100%), and the p-value is a test of heterogeneity across all studies (p value < 0.10 indicates likely variation across pooled estimates related to statistical heterogeneity). A minimally important change in FEV1 was defined as an increase or decrease of 0.2 liters or more.<sup>15</sup>

Abbreviations: AUC, area under the curve; CI, confidence interval; FEV1, forced expiratory volume in 1 second; ICS, inhaled corticosteroid; LABA, long-acting beta-agonist; LAMA, long-acting muscarinic antagonist; MD, mean difference; SD, standard deviation

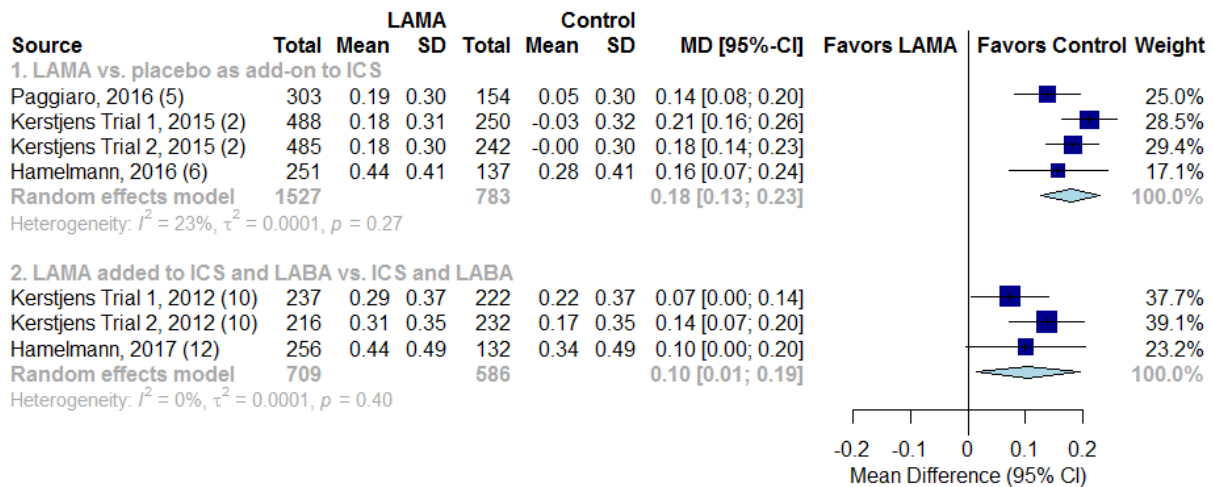



## eFigure 7. FEV1 % predicted

Box sizes are proportional to study weight (box center positioned at point estimate of effect). The mean value represents the mean change from baseline (change score) for each study group and the mean difference (MD) value represents the difference in change scores (change from baseline) between the LAMA and Control groups. Horizontal lines indicate 95% CIs. The  $I^2$  value indicates the percentage of variability across the pooled estimates attributable to statistical heterogeneity (range 0-100%), and the p-value is a test of heterogeneity across all studies (p value < 0.10 indicates likely variation across pooled estimates related to statistical heterogeneity).

Abbreviations: CI, confidence interval; FEV1, forced expiratory volume in 1 second; ICS, inhaled corticosteroid; LABA, long-acting beta-agonist; LAMA, long-acting muscarinic antagonist; MD, mean difference; SD, standard deviation

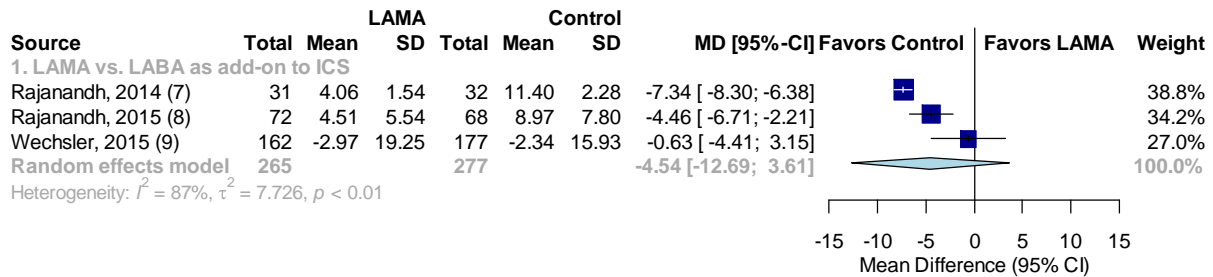

## eFigure 8. FVC peak (L)

Box sizes are proportional to study weight (box center positioned at point estimate of effect). The mean value represents the mean change from baseline (change score) for each study group and the mean difference (MD) value represents the difference in change scores (change from baseline) between the LAMA and Control groups. Horizontal lines indicate 95% CIs. The  $I^2$  value indicates the percentage of variability across the pooled estimates attributable to statistical heterogeneity (range 0-100%), and the p-value is a test of heterogeneity across all studies (p value < 0.10 indicates likely variation across pooled estimates related to statistical heterogeneity). A minimally important change in FVC was defined as an increase or decrease of 0.2 liters or more.<sup>15</sup>

Abbreviations: CI, confidence interval; FVC, forced vital capacity; ICS, inhaled corticosteroid; LABA, long-acting beta-agonist; LAMA, long-acting muscarinic antagonist; MD, mean difference; SD, standard deviation

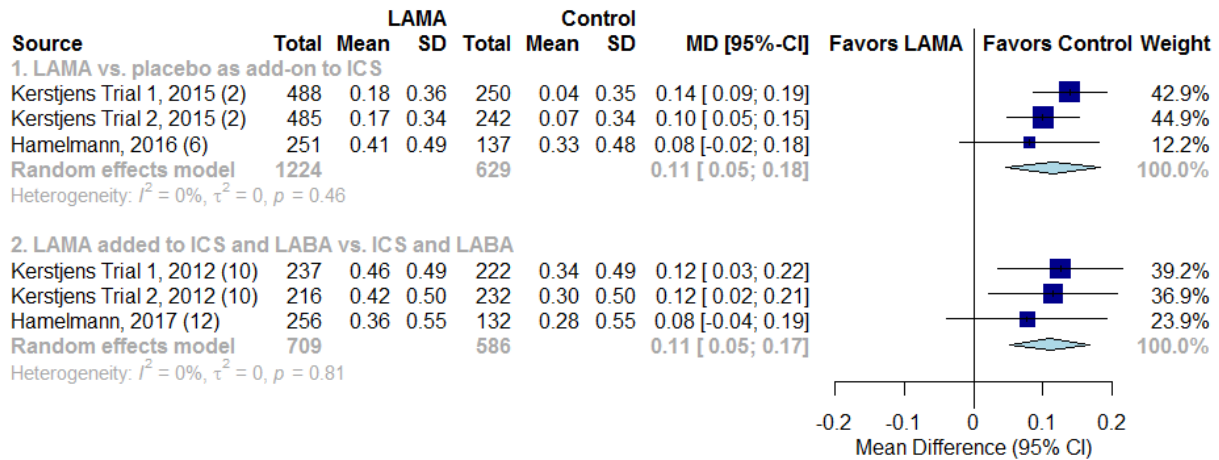

## eFigure 9. FVC trough (L)

Box sizes are proportional to study weight (box center positioned at point estimate of effect). The mean value represents the mean change from baseline (change score) for each study group and the mean difference (MD) value represents the difference in change scores (change from baseline) between the LAMA and Control groups. Horizontal lines indicate 95% CIs. The  $I^2$  value indicates the percentage of variability across the pooled estimates attributable to statistical heterogeneity (range 0-100%), and the p-value is a test of heterogeneity across all studies (p value < 0.10 indicates likely variation across pooled estimates related to statistical heterogeneity). A minimally important change in FVC was defined as an increase or decrease of 0.2 liters or more.<sup>15</sup>

Abbreviations: CI, confidence interval; FVC, forced vital capacity; ICS, inhaled corticosteroid; LABA, long-acting beta-agonist; LAMA, long-acting muscarinic antagonist; MD, mean difference; SD, standard deviation

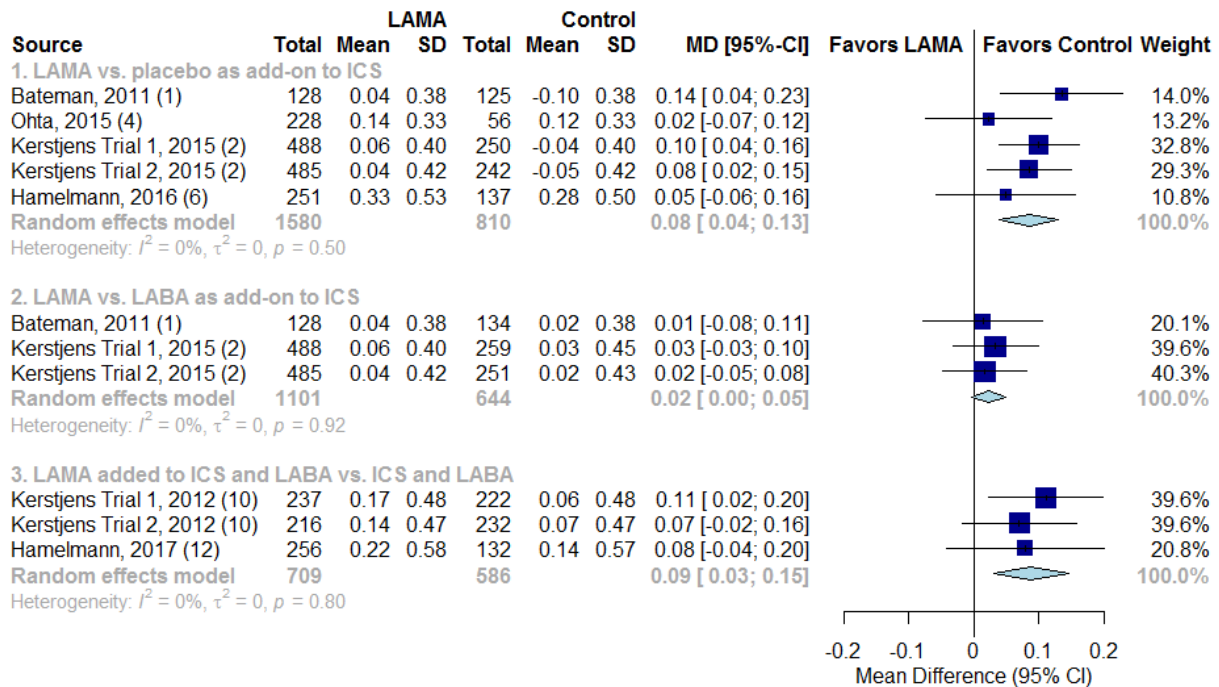

## eFigure 10. FVC AUC (L)

Box sizes are proportional to study weight (box center positioned at point estimate of effect). The mean value represents the mean change from baseline (change score) for each study group and the mean difference (MD) value represents the difference in change scores (change from baseline) between the LAMA and Control groups. Horizontal lines indicate 95% CIs. The  $I^2$  value indicates the percentage of variability across the pooled estimates attributable to statistical heterogeneity (range 0-100%), and the p-value is a test of heterogeneity across all studies (p value < 0.10 indicates likely variation across pooled estimates related to statistical heterogeneity). A minimally important change in FVC was defined as an increase or decrease of 0.2 liters or more.<sup>15</sup>

Abbreviations: AUC, area under the curve; CI, confidence interval; FVC, forced vital capacity; ICS, inhaled corticosteroid; LABA, long-acting beta-agonist; LAMA, long-acting muscarinic antagonist; MD, mean difference; SD, standard deviation

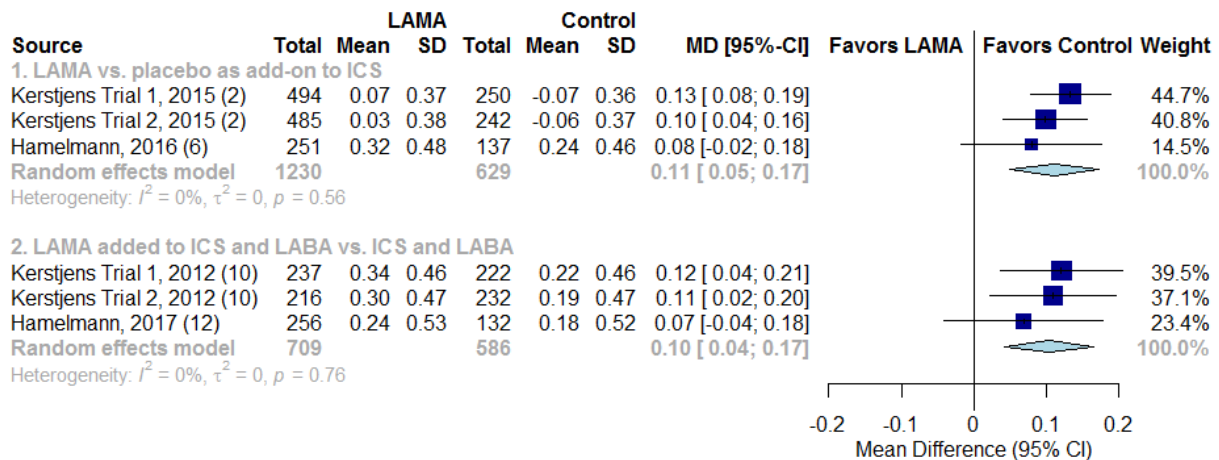

## eFigure 11. AQLQ score

Box sizes are proportional to study weight (box center positioned at point estimate of effect). The mean value represents the mean change from baseline (change score) for each study group and the mean difference (MD) value represents the difference in change scores (change from baseline) between the LAMA and Control groups. Horizontal lines indicate 95% CIs. The  $I^2$  value indicates the percentage of variability across the pooled estimates attributable to statistical heterogeneity (range 0-100%), and the p-value is a test of heterogeneity across all studies (p value < 0.10 indicates likely variation across pooled estimates related to statistical heterogeneity). AQLQ (range 1 [severe impairment] to 7 [no impairment]) is an asthma-specific quality of life tool. The minimal important difference is a 0.5 point change.<sup>16,17</sup>

Abbreviations: AQLQ, Asthma Quality of Life Questionnaire; CI, confidence interval; ICS, inhaled corticosteroid; LABA, long-acting beta-agonist; LAMA, long-acting muscarinic antagonist; MD, mean difference; SD, standard deviation

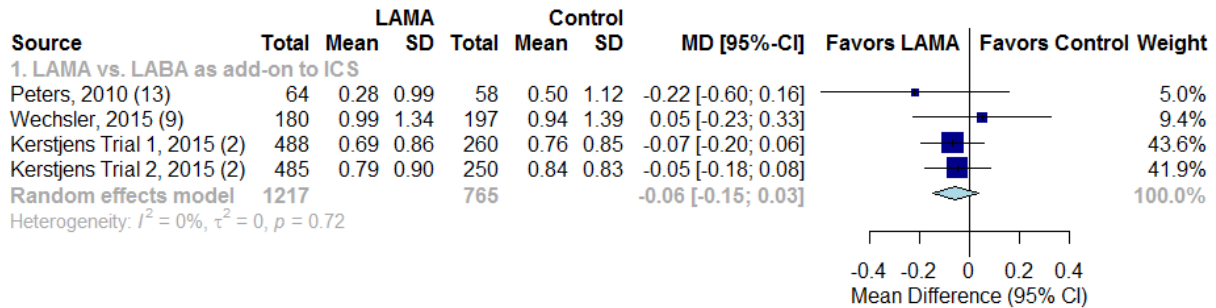

**eFigure 12. Metaregression for Association of Exacerbation Risk with Duration of Study (n=5) Follow-up (LAMA vs. Placebo as add-on to ICS)**

This is a scatter plot with the log risk ratio of exacerbations for each study on the y-axis and the duration of study follow-up (weeks) on the x-axis. Each blue bubble represents a study in the analysis with the size of the bubble being inversely proportional to the variance of the estimated treatment effect. For this analysis, duration of study follow-up was not associated with a change in exacerbation risk ( $p=0.06$ ).

Abbreviations: ICS, inhaled corticosteroid; LAMA, long-acting muscarinic antagonist

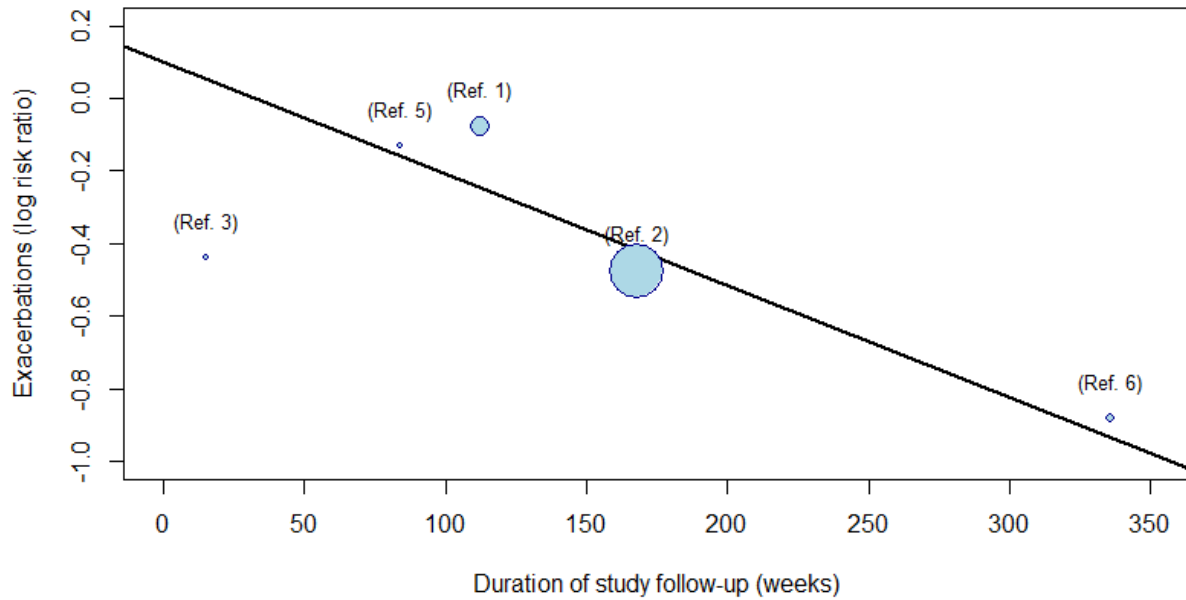

**eFigure 13. Metaregression for Association of Exacerbation Risk with Duration of Study (n=4) Follow-up (LAMA vs. LABA as add-on to ICS)**

This is a scatter plot with the log risk ratio of exacerbations for each study on the y-axis and the duration of study follow-up (weeks) on the x-axis. Each blue bubble represents a study in the analysis with the size of the bubble being inversely proportional to the variance of the estimated treatment effect. For this analysis, duration of study follow-up was not associated with a change in exacerbation risk ( $p=0.56$ ).

Abbreviations: ICS, inhaled corticosteroid; LAMA, long-acting muscarinic antagonist

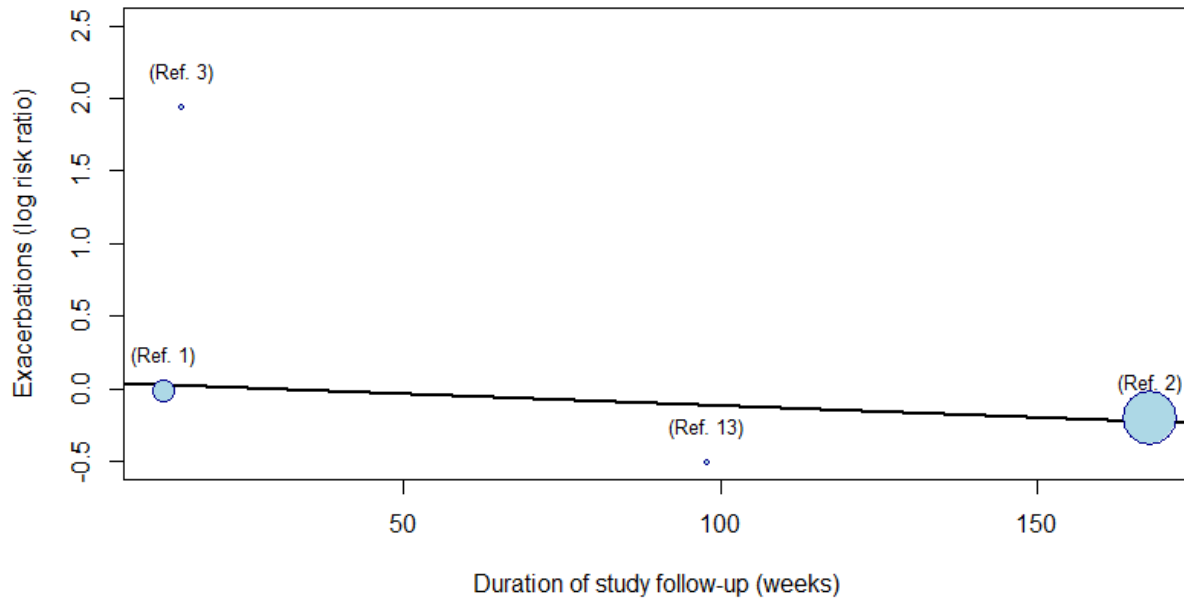

**eFigure 14. Metaregression for Association of Change in FEV1 (L) with Duration of Study (n=7) Follow-up (LAMA vs. Placebo as add-on to ICS)**

This is a scatter plot with the change in FEV1 (L) for each study on the y-axis and the duration of study follow-up (weeks) on the x-axis. Each blue bubble represents a study in the analysis with the size of the bubble being inversely proportional to the variance of the estimated treatment effect. The mean difference (MD) value represents the difference in change scores (change from baseline) between the LAMA and Control groups. For this analysis, duration of study follow-up was not associated with a change in exacerbation risk ( $p=0.32$ ).

Abbreviations: FEV1, forced expiratory volume in 1 second; ICS, inhaled corticosteroid; L, liters; LAMA, long-acting muscarinic antagonist

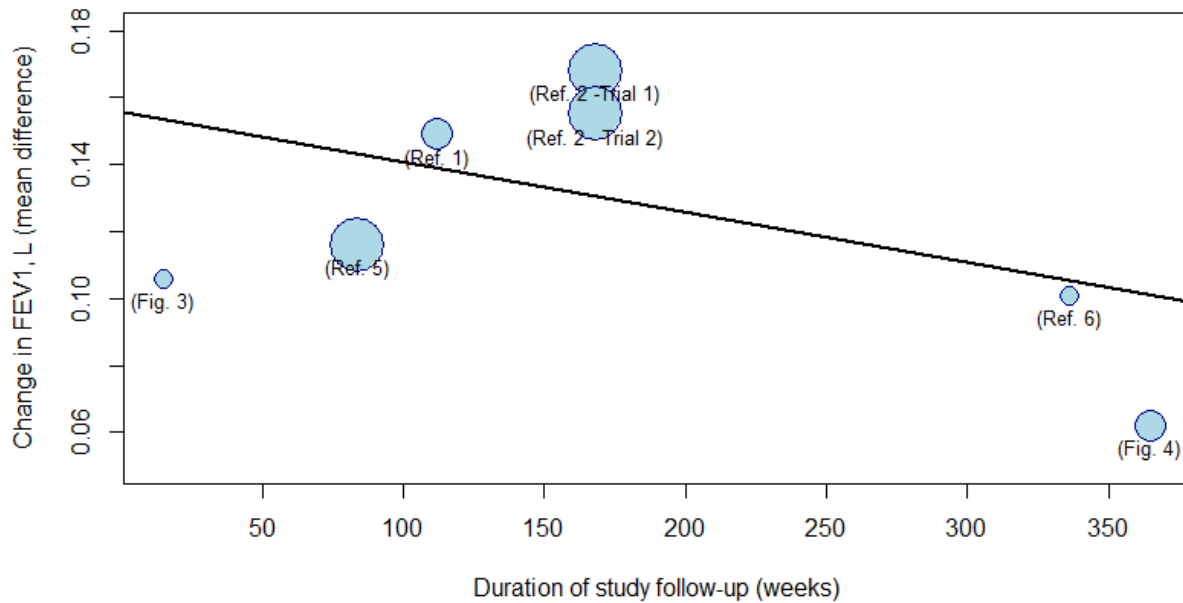



**eFigure 15. Metaregression for Association of Change in FEV1 (L) with Duration of Study (n=6) Follow-up (LAMA vs. LABA as add-on to ICS)**

This is a scatter plot with the change in FEV1 (L) for each study on the y-axis and the duration of study follow-up (weeks) on the x-axis. Each blue bubble represents a study in the analysis with the size of the bubble being inversely proportional to the variance of the estimated treatment effect. The mean difference (MD) value represents the difference in change scores (change from baseline) between the LAMA and Control groups. For this analysis, duration of study follow-up was not associated with a change in exacerbation risk ( $p=0.73$ ).

Abbreviations: FEV1, forced expiratory volume in 1 second; ICS, inhaled corticosteroid; L, liters; LAMA, long-acting muscarinic antagonist

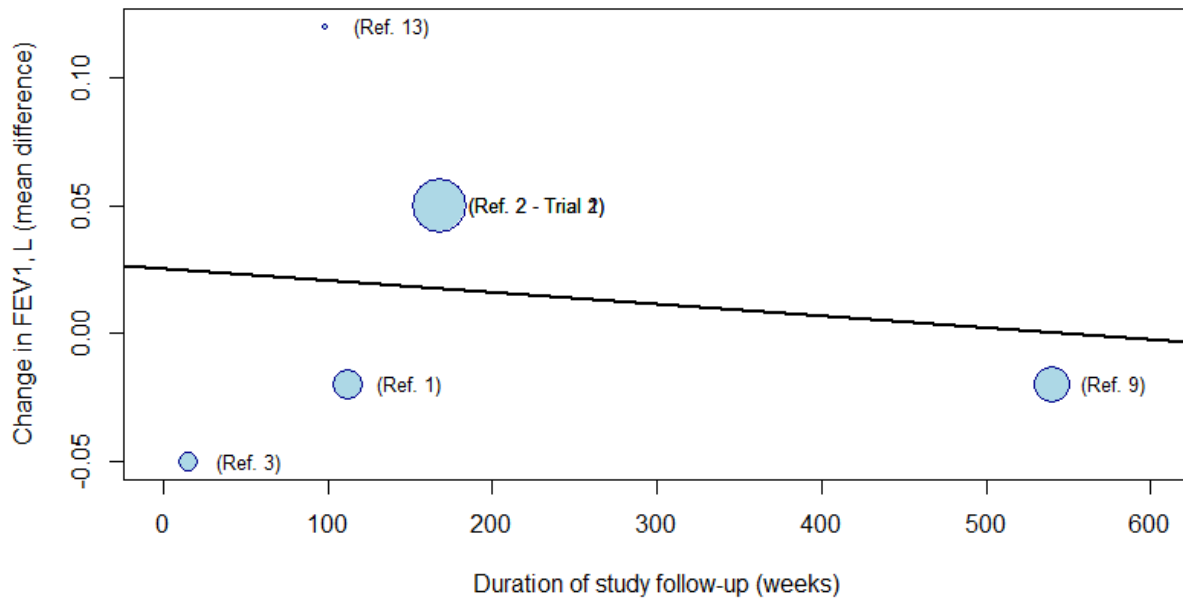

**eFigure 16. Metaregression for Association of Rescue Medication Use (puffs/24h) with Duration of Study (n=7) Follow-up (LAMA vs. Placebo as add-on to ICS)**

This is a scatter plot with the change in rescue medication use (puffs/24h) for each study on the y-axis and the duration of study follow-up (weeks) on the x-axis. Each blue bubble represents a study in the analysis with the size of the bubble being inversely proportional to the variance of the estimated treatment effect. The mean difference (MD) value represents the difference in change scores (change from baseline) between the LAMA and Control groups. For this analysis, duration of study follow-up was not associated with a change in exacerbation risk ( $p=0.34$ ).

Abbreviations: h, hours; ICS, inhaled corticosteroid; LAMA, long-acting muscarinic antagonist

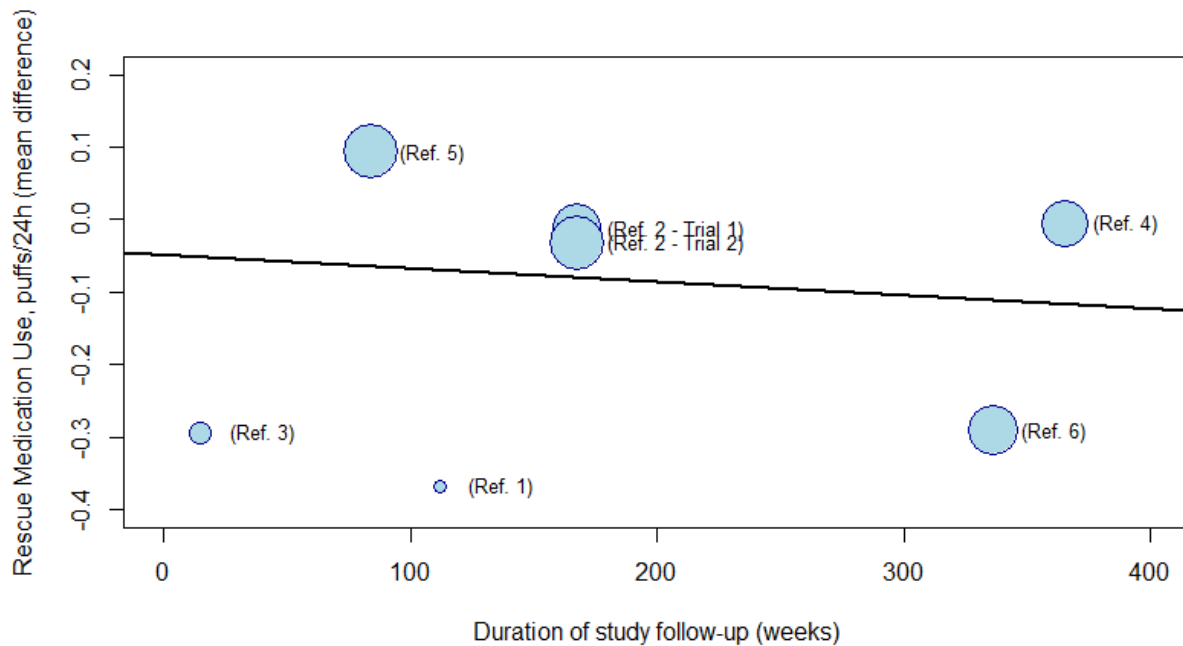

**eFigure 17. Metaregression for Association of Rescue Medication Use (puffs/24h) with Duration of Study (n=7) Follow-up (LAMA vs. LABA as add-on to ICS)**

This is a scatter plot with the change in rescue medication use (puffs/24h) for each study on the y-axis and the duration of study follow-up (weeks) on the x-axis. Each blue bubble represents a study in the analysis with the size of the bubble being inversely proportional to the variance of the estimated treatment effect. The mean difference (MD) value represents the difference in change scores (change from baseline) between the LAMA and Control groups. For this analysis, duration of study follow-up was not associated with a change in exacerbation risk ( $p=0.67$ ).

Abbreviations: h, hours; ICS, inhaled corticosteroid; LAMA, long-acting muscarinic antagonist

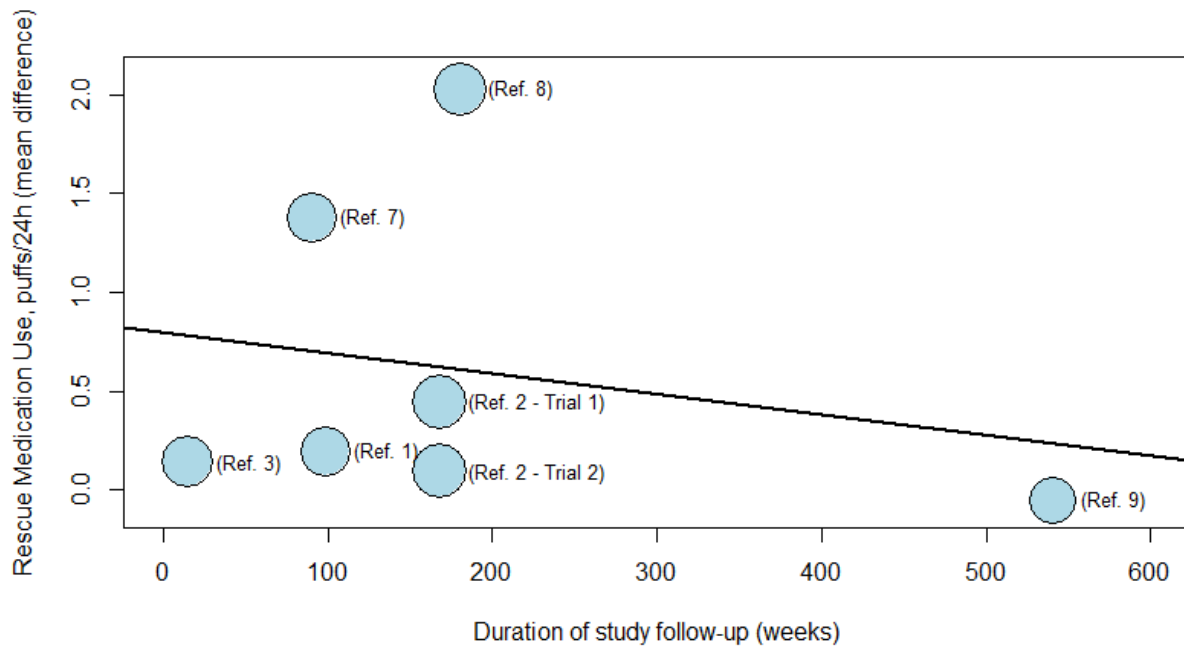

## Supplementary Content References

1. Bateman ED, Kornmann O, Schmidt P, Pivovarova A, Engel M, Fabbri LM. Tiotropium is noninferior to salmeterol in maintaining improved lung function in B16-Arg/Arg patients with asthma. *J Allergy Clin Immunol*. 2011;128(2):315-22.
2. Kerstjens HA, Casale TB, Bleecker ER, et al. Tiotropium or salmeterol as add-on therapy to inhaled corticosteroids for patients with moderate symptomatic asthma: two replicate, double-blind, placebo-controlled, parallel-group, active-comparator, randomised trials. *Lancet Respir Med*. 2015;3(5):367-76.
3. Lee LA, Yang S, Kerwin E, Trivedi R, Edwards LD, Pascoe S. The effect of fluticasone furoate/umeclidinium in adult patients with asthma: a randomized, dose-ranging study. *Respir Med*. 2015;109(1):54-62.
4. Ohta K, Ichinose M, Tohda Y, et al. Long-term once-daily tiotropium respimat is well tolerated and maintains efficacy over 52 weeks in patients with symptomatic asthma in Japan: a randomized, placebo-controlled study. *PLoS One*. 2015;10(4):e0124109
5. Paggiaro P, Halpin DM, Buhl R, et al. The effect of tiotropium in symptomatic asthma despite low- to medium-dose inhaled corticosteroids: a randomized controlled trial. *J Allergy Clin Immunol Pract*. 2016;4(1):104-13.
6. Hamelmann E, Bateman ED, Vogelberg C, et al. Tiotropium add-on therapy in adolescents with moderate asthma: A 1-year randomized controlled trial. *J Allergy Clin Immunol*. 2016;138(2):441-450.
7. Rajanandh MG, Nageswari AD, Ilango K. Pulmonary function assessment in mild to moderate persistent asthma patients receiving montelukast, doxofylline, and tiotropium with budesonide: a randomized controlled study. *Clin Ther*. 2014;36(4):526-33.
8. Rajanandh MG, Nageswari AD, Ilango K. Assessment of montelukast, doxofylline, and tiotropium with budesonide for the treatment of asthma: which is the best among the second-line treatment? A randomized trial. *Clin Ther*. 2015;37(2):418-26.
9. Wechsler ME, Yawn BP, Fuhlbrigge AL, et al. Anticholinergic vs long-acting  $\beta$ -agonist in combination with inhaled corticosteroids in black adults with asthma: the BELT randomized clinical trial. *JAMA*. 2015;314(16):1720-30.
10. Kerstjens HA, Engel M, Dahl, et al. Tiotropium in asthma poorly controlled with standard combination therapy. *N Engl J Med*. 2012;367(13):1198-207.
11. Wang K, Tian P, Fan Y, Wang Y, Liu C. Assessment of second-line treatments for patients with uncontrolled moderate asthma. *Int J Clin Exp Med*. 2015;8(10):19476-80.
12. Hamelmann E, Bernstein JA, Vandewalker M, et al. A randomised controlled trial of tiotropium in adolescents with severe symptomatic asthma. *Eur Respir J*. 2017;49(1): pii: 1601100.
13. Peters SP, Kunselman SJ, Icitovic N, et al. Tiotropium bromide step-up therapy for adults with uncontrolled asthma. *N Engl J Med*. 2010;363(18):1715-26.
14. Juniper E, Svensson K, Mork AC, et al. Measurement properties and interpretation of three shortened versions of the asthma control questionnaire. *Respir Med*. 2005;99(5):553-8.
15. Santanello NC, Zhang J, Seidenberg B, Reiss TF, Barber BL. What are minimal important changes for asthma measures in a clinical trial? *Eur Respir J*. 1999;14(1):23-7.
16. Juniper EF, Buist S, Cox FM, et al. Validation of a standardized version of the Asthma Quality of Life Questionnaire. *Chest*. 1999;115(5):1265-70.
17. Juniper EF, Guyatt GH, Willam A, et al. Determining a minimal important change in disease-specific quality of life questionnaire. *J Clin Epidemiol*. 1994;47(1):81-7.
